# Supplementary material for: A protein phosphatase 2A complex spatially controls plant cell division
Source: Springer Nature journal article supplement (doi:10.1038/ncomms2831), 2013-05-14
Supplement: 41467_2013_BFncomms2831_MOESM32_ESM.pdf [file 41467_2013_BFncomms2831_MOESM32_ESM.pdf]

## Supplementary Figure S1

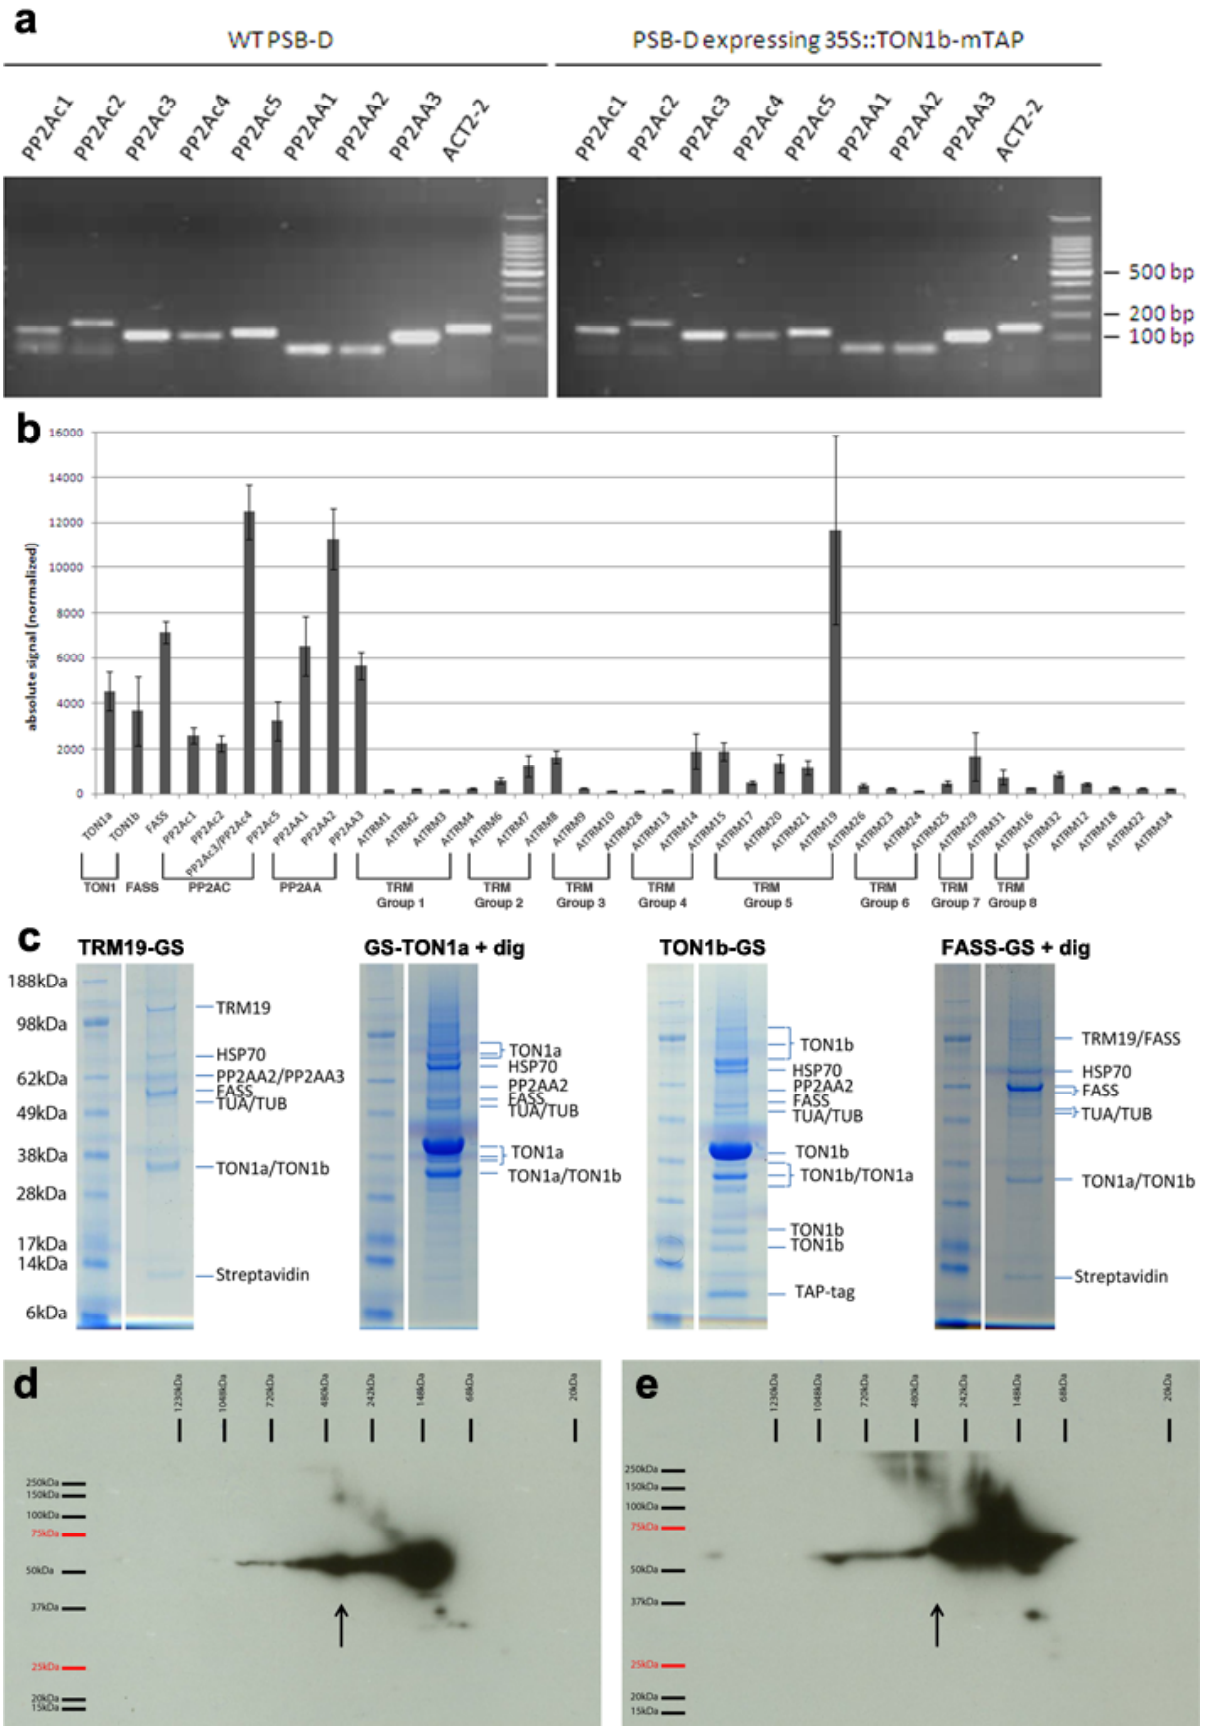

## Supplementary Figure S1: Expression and TAP analysis of TTP members in *Arabidopsis* cell culture

(a) RT-PCR analysis of *Arabidopsis* PP2AA and PP2AC subunits in control cells and in Pro35S:TON1b-mTAP expressing cells.

(b) Gene expression analysis of the TTP complex genes in *Arabidopsis* cell culture using the Genevestigator tool<sup>61</sup>. No Affymetrix probes are available for the *TRM5*, *TRM11*, *TRM27*, *TRM30* and *TRM33* genes.

(c) Representative Coomassie stained gels for all bait proteins used in the TAP experiments (TON1a, TON1b, FASS and TRM19) followed by MALDI TOF/TOF analysis. Proteins in the TAP eluates were separated on a 4-12% gradient NuPAGE gel (Invitrogen) and visualized with colloidal Coomassie Brilliant Blue staining. The most abundant proteins detected in each visible band on gel are indicated. In brief, the identified proteins were traced back to their gel slice number via MALDI spot numbers, making it possible to indicate the most abundant identified protein(s) in each visible band on SDS-PAGE. Some of the visible bands on SDS-PAGE correspond to non-specific co-purified proteins like HSP70, TUA/TUB, streptavidin etc... Such background proteins are not presented in the final table of interactors, as known background proteins (obtained from cultures expressing TAP-tagged mock proteins GUS, RFP and GFP) are systematically subtracted from the interactor lists as indicated in the Methods section. Identified proteins which do not give a clear visible band on SDS-PAGE or which are not the most abundant protein in a visible band on the SDS-PAGE gels are not indicated. Left lanes of each panel correspond to molecular weight standards.

(d-e) 2D Blue Native/SDS-PAGE on total protein extracts of PSB-D *Arabidopsis* cell suspension cells expressing Pro35S::TON1b-GS (d) or Pro35S::GS-TON1a (e) followed by Western blot detection using the Peroxidase Anti-Peroxidase (PAP) antibody that binds the GS-tag. The observed smear indicates incorporation of the GS-fused proteins in high molecular weight range complexes with an accumulation at an estimated size of 300-350 kDa (arrows). The strong signal at around 100kDa likely reflects the migration of uncomplexed TON1 proteins as dimers.

<sup>61</sup>Zimmermann, P., Hirsch-Hoffmann, M., Hennig, L., and Gruissem, W. GENEVESTIGATOR. *Arabidopsis* microarray database and analysis toolbox. *Plant Physiol* **136**, 2621-2632 (2004)

## Supplementary Figure S2

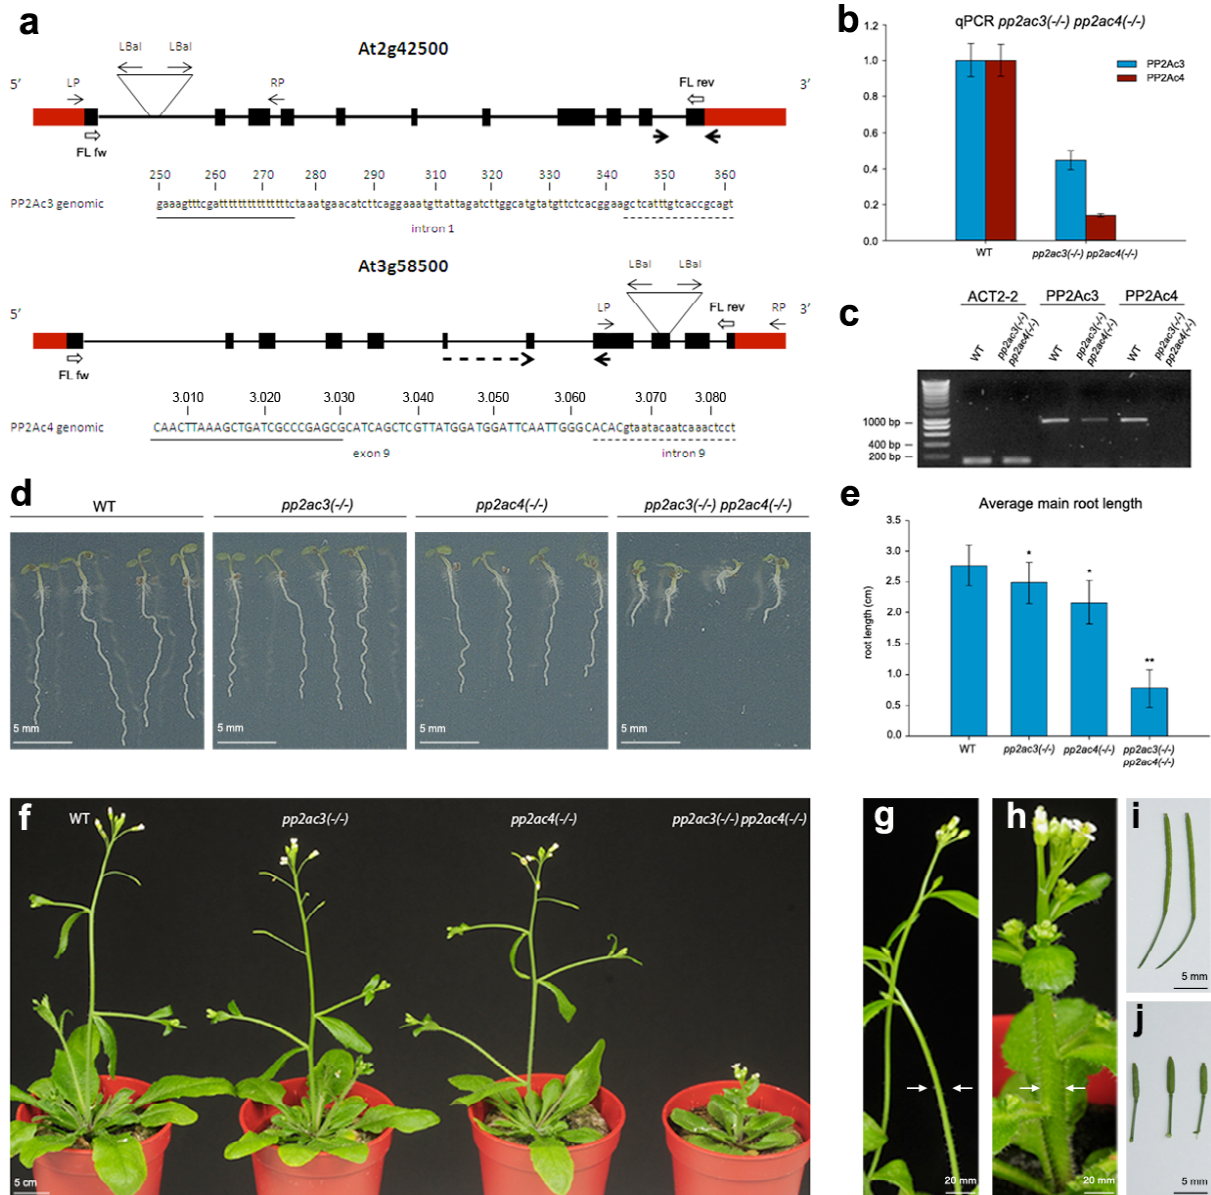

### Supplementary Figure S2 : Analysis of *pp2ac3-c4* double mutant

(a) Gene models of *PP2AC3* and *PP2AC4* with indication of the respective T-DNA insertions and primers used for genotyping (LP, RP, LBAI), qPCR (bold arrows) and RT-PCR (FL fw and FL rev). Sequencing both the LBAI-LP and LBAI-RP PCR products allowed us to determine the exact insertion positions (underlined and dashed sequences) and to confirm the presence of tandem repeat T-DNA insertions in both lines. (b) Quantitative PCR (qPCR) analysis between wild type (Col-0) and the *pp2ac3-c4* double mutant showing significant reduction in *PP2AC3* and *PP2AC4* messenger levels. Expression of *PP2AC3* appears less reduced than *PP2AC4*. Both actin and *eif4A* were used as normalization genes. (c) RT-PCR analysis showing residual expression of full-length *PP2AC3* mRNA, while no full-length *PP2AC4* mRNA could be detected in the *pp2ac3-c4* double mutant. Actin (*Act2-2*) primers were used for normalization. (d) Representative images of wild type (Col-0), *pp2ac3*, *pp2ac4* and *pp2ac3-c4* double mutant seedlings showing severely affected main root growth of the *pp2ac3-c4* double mutant. (e) Average main root length of wild type (n=96), *pp2ac3* (n=38),

*pp2a-c4* (n=35) and the *pp2ac3-ac4* double mutant (n=52). Single *pp2ac* mutants already show a statistical reduction in average main root length compared to wild type (T-test,  $P < 10^{-4}$  and  $P < 10^{-10}$  for *pp2ac3* and *pp2ac4* respectively) and the defects in main root growth are strongly enhanced (T-test,  $P < 10^{-60}$ ) in the *pp2ac3-c4* double mutant. **(f-j)** The *pp2ac3* and *pp2ac4* single mutants develop to wild type looking mature plants while the *pp2ac3-c4* double mutant are dwarfed plant with small, thick and round leaves, thick flowering stems **(g, h)** and shorter siliques **(i, j)**.

### Supplementary Figure S3

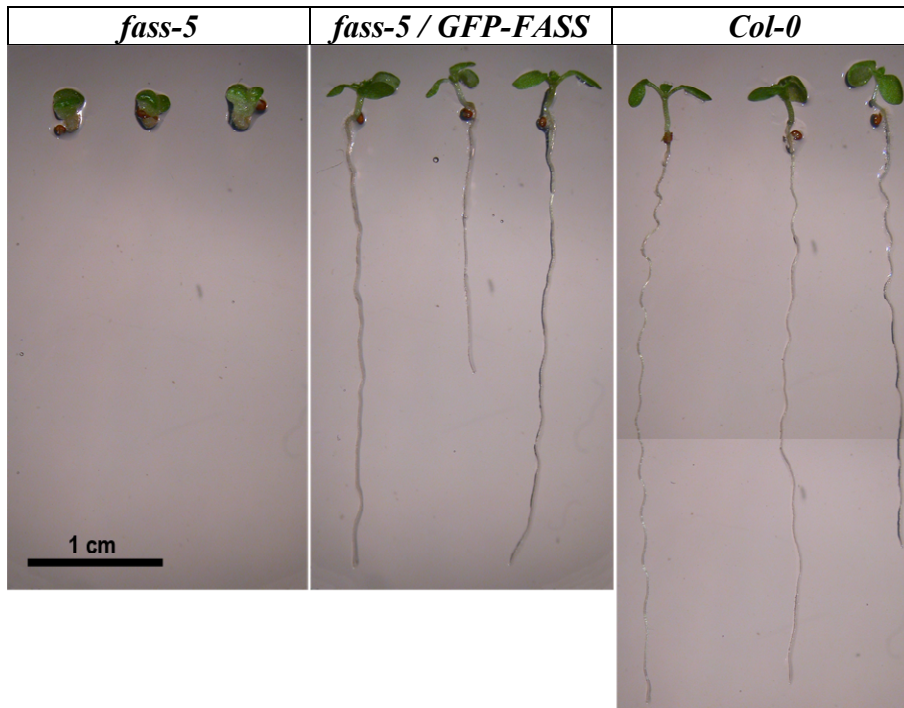

#### Supplementary Figure S3: The GFP-FASS fusion complements the *fass* mutant phenotype

Wild-type *Arabidopsis* and heterozygous *fass-5* plants were infiltrated with *Agrobacterium* carrying the Pro35S:GFP-FASS construct. At least 20 primary transformants were obtained for each genotype. To determine whether the GFP-FASS construct complements the *fass* phenotype, the progenies were analyzed for segregation of the *fass* phenotype and of the hygromycin resistance carried by the T-DNA (GFP-FASS). No plant presenting both hygromycin resistance and the *fass* mutant phenotype was recovered indicating that the GFP-FASS construct complements the *fass* phenotype. Root growth of *fass-5* complemented plants was almost fully restored (compare one-week old seedlings in the middle panel to *fass-5* (left panel) or Col-0 (right panel)).

## Supplementary Figure S4

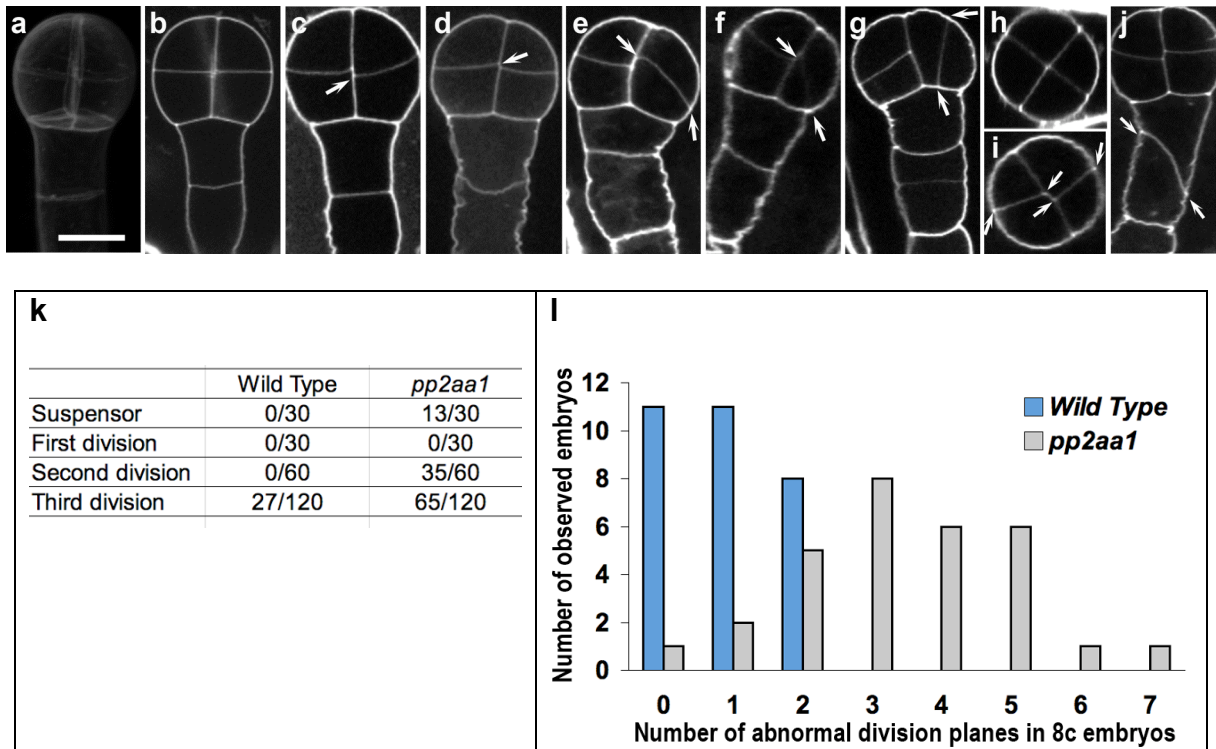

### Supplementary Figure S4: Cell division plane defects in 8-celled *pp2aa1* mutant embryos

(a-j) Propidium Iodide (PI) staining of 8-celled wild type (a-c and h) and *pp2aa1* (d-g, i, j) embryos. In a is shown a 3D reconstruction, in b-g and j, longitudinal views, and in h-i transverse sections of 8-celled embryos. 8-celled embryos result from three rounds of division (seven divisions in total, ie 1+2+4) in the embryo proper. The first division of the apical cell is longitudinal. The two-celled embryo then divides by a second longitudinal division perpendicular to the plane of the previous division. The four resulting cells then divide by transverse divisions, giving rise to the eight-celled embryo. PI imaging and 3D reconstruction of 8-celled embryos allowed to estimate division plane defects during these three rounds of division : Transverse sections enabled to follow the first and second round of division, whereas longitudinal sections revealed abnormal division plane during the third one. The table in k reports cell division plane defects observed in 30 embryos of *pp2aa1* compared to wild type. Abnormal division planes are visible in the second round of divisions in *pp2aa1* embryos where 35 planes were tilted (as shown in i) compared to wild type embryos (h). Defects are even more pronounced during the third round of division. At this stage, slightly tilted planes are present occasionally in wild-type embryos (27/120; as shown in c). Among 65 abnormal division planes observed in *pp2aa1* embryos, 35 appeared slightly tilted as in the wild type (c-d), while, in contrast to wild type, 15 were strongly misplaced as in e and 16, as in f or g. Aberrant division planes are also frequent in the suspensor of *pp2aa1* embryos (in 13/30 embryos as shown in j) but never observed in wild type. (l) Number of embryos displaying 0 to 7 abnormal division planes in wild type compared to *pp2aa1* embryos. Most *pp2aa1* embryos have more than 2 abnormal division planes. Wild type embryos reported here as having abnormal planes only have slightly tilted division planes.

Images in a to j are at the same scale (bar = 10  $\mu$ m in a).

## Supplementary Figure S5

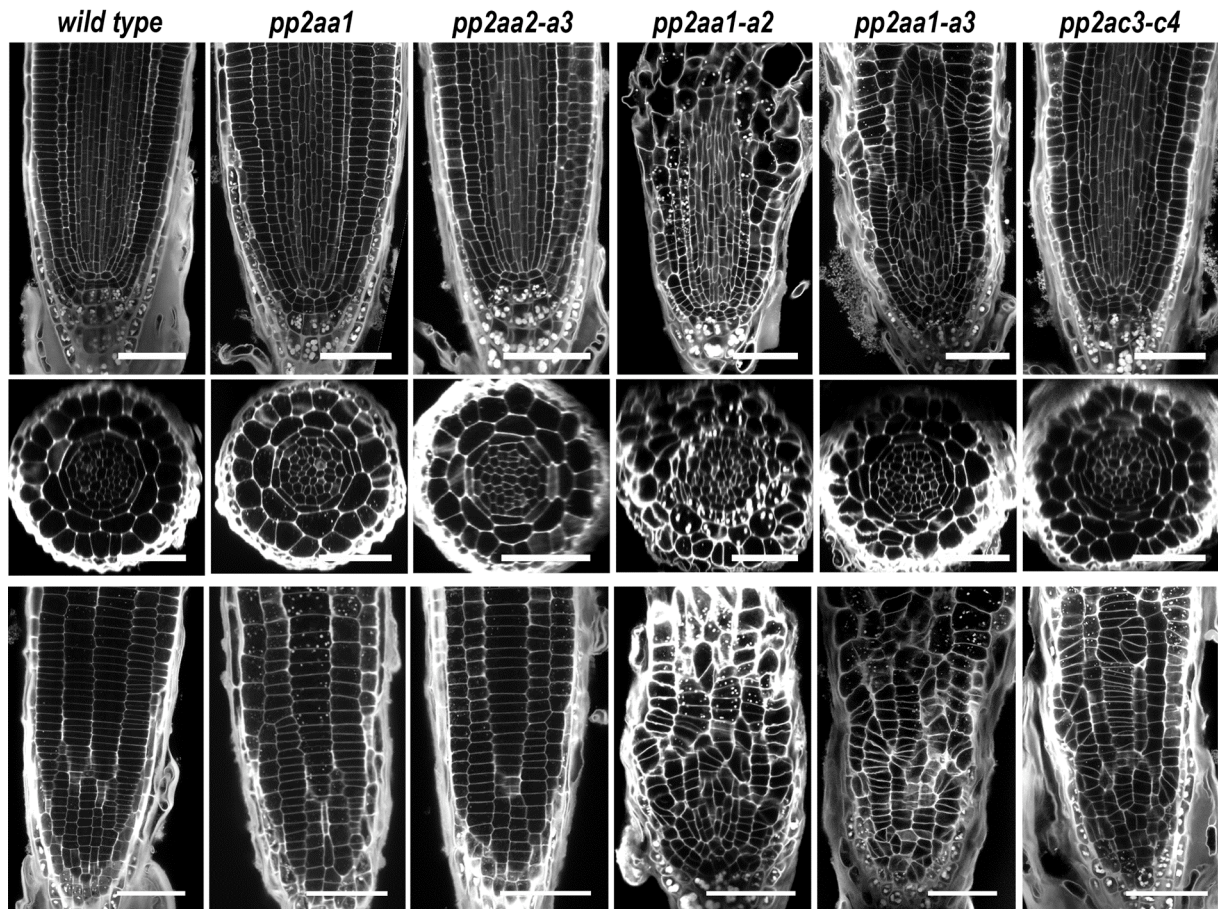

### Supplementary Figure S5 : Cell division plane defects in roots of *pp2aaa* and *pp2ac* mutants

Longitudinal (upper panels), transverse (mid panels), and tangential views of root tips of wild-type (Col-0), *pp2aa1*, *pp2aa2-a3*, *pp2aa1-a2*, *pp2aa1-a3*, *pp2ac3-c4* three-day old seedlings stained with propidium iodide.

Bars = 50  $\mu$ m in all images.

## Supplementary Figure S6

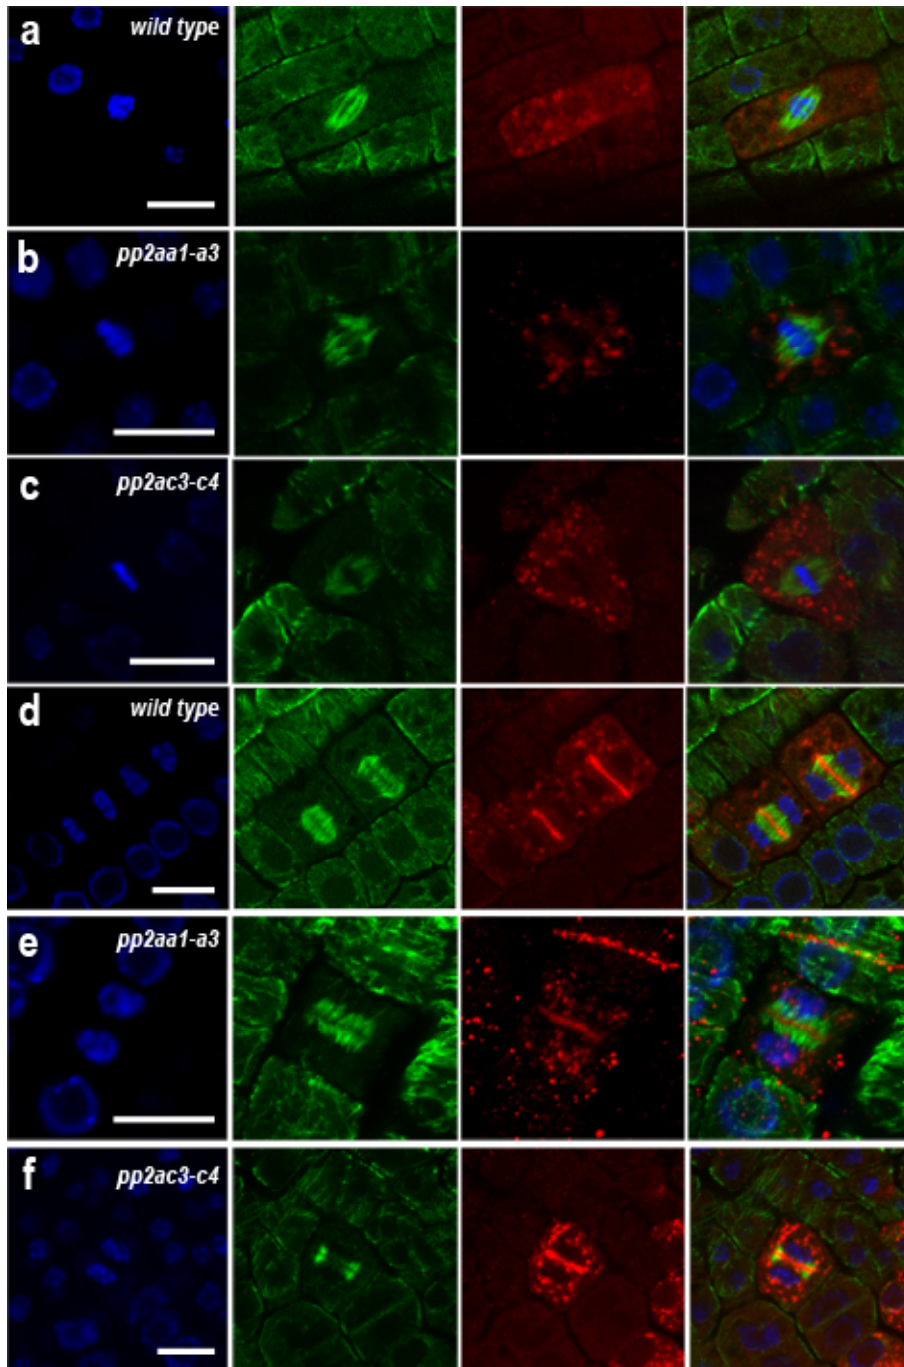

### Supplementary Figure S6 : *pp2aa* and *pp2ac* mutations don't affect spindle and phragmoplast

(a-c) Spindles and (d-f) phragmoplasts. Whole mount immuno-localization of  $\alpha$ -tubulin, and KNOLLE in root tip cells of wild type (a and d), *pp2aa1-a3* (b and e), *pp2ac3-c4* (c and f) double mutants. Here are shown DAPI staining (in blue), anti- $\alpha$ -tubulin (in green), anti-KNOLLE (red), and overlay images. Bars = 10 $\mu$ m in a-f.



## Supplementary Figure S7

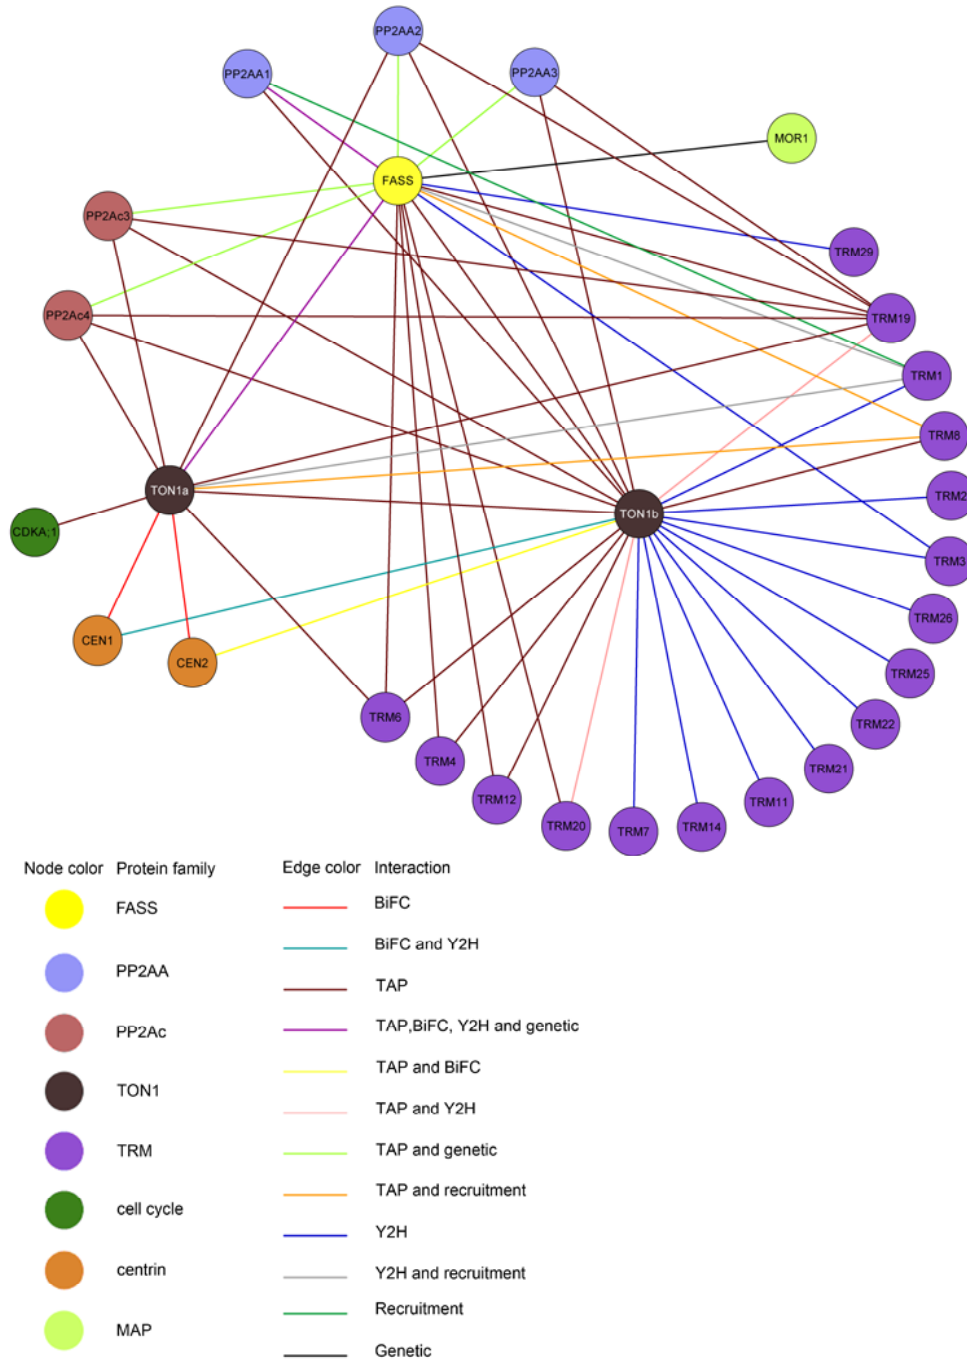

### Supplementary Figure S7: Interactome map overview of all TTP protein interactions

This protein-protein interaction network includes all known interactions concerning the TTP proteins. The presented data is a combination of novel data described in this paper and previously published interactions<sup>10,11,12,15,25,43</sup>. The nodes represent individual proteins and the node colors are indicative of the different protein families. The lines connecting the nodes indicate known interactions and are color-coded dependent on the techniques used to identify the interactions.

# Supplementary Table S1 : MALDI MS/MS analysis of TAP eluates

| Bait  | TAP Protocol | Prev          |             |                   |               | Database version | PMF data |                 |                     |                 |                 | MSMS data      |       |     |          |         |          |       |      |            |          | Variable Modification     |
|-------|--------------|---------------|-------------|-------------------|---------------|------------------|----------|-----------------|---------------------|-----------------|-----------------|----------------|-------|-----|----------|---------|----------|-------|------|------------|----------|---------------------------|
|       |              | Prey Locus    | Prey Name   | # Found/<br># exp | Protein Score |                  | Expect   | RMS error (ppm) | Sequence coverage % | Unique Peptides | Total Ion Score | Peptide Number | Start | End | Observed | Mr(Exp) | Mr(Calc) | Delta | Miss | Ions Score | Expect   |                           |
| TON1a | -dig         | AT3G55005     | TON1b       | 4/4               | TAIR8         | 156              | 8,20E-12 | 4               | 42                  | 8               | 106             | 1              | 237   | 243 | 863.44   | 862.43  | 862.43   | 0.00  | 0    | 32         | 2,00E-02 | R.NLTSSWR.N               |
|       |              |               |             |                   |               |                  |          |                 |                     |                 |                 | 2              | 34    | 45  | 1394.64  | 1393.64 | 1393.64  | 0.00  | 0    | 52         | 1,00E-04 | R.ASVFEAIEEDR.V           |
|       |              |               |             |                   |               |                  |          |                 |                     |                 |                 | 3              | 126   | 142 | 1958.05  | 1957.04 | 1957.05  | -0.01 | 0    | 22         | 7,40E-02 | R.NEDSRPLLDVLEGLK.F       |
| TON1a | -dig         | AT5G18580     | FASS        | 4/4               | TAIR8         | 207              | 6,50E-17 | 6               | 25                  | 11              | 146             | 1              | 244   | 252 | 1272.56  | 1271.55 | 1271.55  | 0.00  | 0    | 15         | 2,80E-01 | K.FFFFCDPHR.R             |
|       |              |               |             |                   |               |                  |          |                 |                     |                 |                 | 2              | 369   | 379 | 1311.65  | 1310.64 | 1310.65  | -0.01 | 0    | 50         | 2,50E-04 | K.DTPEGLTYLFR.C           |
|       |              |               |             |                   |               |                  |          |                 |                     |                 |                 | 3              | 18    | 29  | 1384.77  | 1383.76 | 1383.77  | -0.01 | 1    | 12         | 9,70E-01 | R.KIPPASSMLWVR.N          |
|       |              |               |             |                   |               |                  |          |                 |                     |                 |                 | 4              | 387   | 399 | 1477.77  | 1476.76 | 1476.77  | -0.01 | 0    | 25         | 7,20E-02 | R.GFLTADHSLFR.D           |
|       |              |               |             |                   |               |                  |          |                 |                     |                 |                 | 5              | 321   | 334 | 1656.81  | 1655.8  | 1655.8   | 0.00  | 0    | 44         | 7,30E-04 | K.EYADGTLTEIFIER.V        |
| TON1a | -dig         | AT3G25800     | PP2AA2      | 1/4               | TAIR8         | 58               | 5,10E-02 | 12              | 32                  | 12              | /               |                |       |     |          |         |          |       |      |            |          |                           |
| TON1a | -dig         | AT2G42500/AT3 | PP2A3/PP2A4 | 1/4               | TAIR8         | 68               | 4,60E-03 | 7               | 28                  | 6               | 34              | 1              | 260   | 272 | 1589.78  | 1588.78 | 1588.77  | 0.01  | 0    | 34         | 9,40E-03 | K.VVTIFSAFNQYCR.C         |
| TON1a | -dig         | AT2G45240     | MAP1A       | 1/4               | TAIR8         | 47               | 6,50E-01 | 4               | 14                  | 4               | 31              | 1              | 92    | 102 | 1310.69  | 1309.68 | 1309.68  | 0.00  | 0    | 31         | 1,70E-02 | K.LPHFDWTGTLK.Q           |
| TON1a | +dig         | AT3G55005     | TON1b       | 4/4               | TAIR8         | 441              | 2,60E-40 | 5               | 64                  | 14              | 321             | 1              | 237   | 243 | 863.44   | 862.43  | 862.43   | 0.00  | 0    | 41         | 2,40E-03 | R.NLTSSWR.N               |
|       |              |               |             |                   |               |                  |          |                 |                     |                 |                 | 2              | 222   | 233 | 1330.7   | 1329.69 | 1329.69  | 0.00  | 0    | 40         | 2,50E-03 | R.ASTALENLQLDR.K          |
|       |              |               |             |                   |               |                  |          |                 |                     |                 |                 | 3              | 114   | 125 | 1441.66  | 1440.66 | 1440.66  | 0.00  | 0    | 83         | 7,40E-08 | R.DFSINNGYELNR.N          |
|       |              |               |             |                   |               |                  |          |                 |                     |                 |                 | 4              | 187   | 202 | 1499.7   | 1498.7  | 1498.7   | 0.00  | 0    | 66         | 3,70E-06 | R.SVSASQASGAATSGYR.K      |
|       |              |               |             |                   |               |                  |          |                 |                     |                 |                 | 5              | 126   | 142 | 1958.06  | 1957.05 | 1957.05  | 0.00  | 0    | 92         | 7,60E-09 | R.NEDSRPLLDVLEGLK.F       |
| TON1a | +dig         | AT5G18580     | FASS        | 4/4               | TAIR8         | 390              | 3,30E-35 | 4               | 35                  | 16              | 274             | 1              | 335   | 341 | 901.45   | 900.44  | 900.45   | -0.01 | 0    | 24         | 5,30E-02 | R.VFDEHVR.R               |
|       |              |               |             |                   |               |                  |          |                 |                     |                 |                 | 2              | 457   | 464 | 1002.46  | 1001.45 | 1001.45  | 0.00  | 0    | 30         | 9,80E-03 | R.GFWAHDNR.E              |
|       |              |               |             |                   |               |                  |          |                 |                     |                 |                 | 3              | 19    | 29  | 1256.69  | 1255.68 | 1255.67  | 0.01  | 0    | 19         | 2,50E-01 | K.IPPASSMLWVR.N           |
|       |              |               |             |                   |               |                  |          |                 |                     |                 |                 | 4              | 244   | 252 | 1272.57  | 1271.57 | 1271.55  | 0.02  | 0    | 28         | 1,50E-02 | K.FFFFCDPHR.R             |
|       |              |               |             |                   |               |                  |          |                 |                     |                 |                 | 5              | 369   | 379 | 1311.66  | 1310.65 | 1310.65  | 0.00  | 0    | 25         | 7,10E-02 | K.DTPEGLTYLFR.C           |
|       |              |               |             |                   |               |                  |          |                 |                     |                 |                 | 6              | 18    | 29  | 1384.77  | 1383.77 | 1383.77  | 0.00  | 1    | 0          | 1,40E+01 | R.KIPPASSMLWVR.N          |
|       |              |               |             |                   |               |                  |          |                 |                     |                 |                 | 7              | 387   | 399 | 1477.78  | 1476.78 | 1476.77  | 0.01  | 0    | 59         | 2,50E-05 | R.GFLTADHSLFR.D           |
|       |              |               |             |                   |               |                  |          |                 |                     |                 |                 | 8              | 321   | 334 | 1656.82  | 1655.81 | 1655.8   | 0.01  | 0    | 52         | 1,30E-04 | K.EYADGTLTEIFIER.V        |
|       |              |               |             |                   |               |                  |          |                 |                     |                 |                 | 9              | 101   | 119 | 2204.08  | 2203.07 | 2203.08  | -0.01 | 0    | 36         | 3,90E-03 | K.QSDLLNADDLAAMWVCLR.E    |
| TON1a | +dig         | AT3G25800     | PP2AA2      | 2/4               | TAIR8         | 111              | 2,60E-07 | 9               | 33                  | 13              | 31              | 1              | 279   | 287 | 1047.58  | 1046.57 | 1046.58  | -0.01 | 0    | 1          | 2,30E+01 | R.TELVPAYVR.L             |
| TON1a | +dig         | AT2G42500/AT3 | PP2A3/PP2A4 | 2/4               | TAIR8         | 120              | 3,30E-08 | 4               | 33                  | 8               | 67              | 2              | 133   | 142 | 1121.57  | 1120.57 | 1120.57  | 0.00  | 0    | 30         | 2,80E-02 | R.LAAGEWFTAR.V            |
| TON1a | +dig         | AT3G06810     | IBR3        | 1/4               | TAIR8         | 84               | 1,40E-04 | 6               | 28                  | 17              | /               | 1              | 287   | 298 | 1456.72  | 1455.72 | 1455.73  | -0.01 | 0    | 66         | 4,20E-06 | R.NHTFIQEPAPR.R           |
| TON1b | -dig         | AT3G55000     | TON1a       | 5/5               | TAIR8         | 622              | 2,10E-58 | 10              | 51                  | 15              | 487             | 1              | 241   | 247 | 863.43   | 862.43  | 862.43   | 0.00  | 0    | 26         | 8,30E-02 | R.NLTSSWR.N               |
|       |              |               |             |                   |               |                  |          |                 |                     |                 |                 | 2              | 67    | 75  | 952.53   | 951.52  | 951.52   | 0.00  | 1    | 35         | 6,00E-03 | R.KLHASPSGR.L             |
|       |              |               |             |                   |               |                  |          |                 |                     |                 |                 | 3              | 207   | 213 | 994.48   | 993.47  | 993.47   | 0.00  | 1    | 38         | 3,20E-03 | R.KDEFNWR.Q               |
|       |              |               |             |                   |               |                  |          |                 |                     |                 |                 | 4              | 175   | 185 | 1144.57  | 1143.56 | 1143.55  | 0.01  | 0    | 33         | 1,00E-02 | R.SSASDSLPPQR.R           |
|       |              |               |             |                   |               |                  |          |                 |                     |                 |                 | 5              | 226   | 237 | 1300.69  | 1299.68 | 1299.68  | 0.00  | 0    | 58         | 3,40E-05 | R.ASAALENLQLDR.K          |
|       |              |               |             |                   |               |                  |          |                 |                     |                 |                 | 6              | 34    | 45  | 1394.68  | 1393.67 | 1393.64  | 0.03  | 0    | 61         | 1,80E-05 | R.ASVFEAIEEDR.V           |
|       |              |               |             |                   |               |                  |          |                 |                     |                 |                 | 7              | 114   | 125 | 1426.65  | 1425.65 | 1425.63  | 0.02  | 0    | 85         | 5,20E-08 | R.DFNSNNGFELNR.N          |
|       |              |               |             |                   |               |                  |          |                 |                     |                 |                 | 8              | 126   | 142 | 1786.97  | 1785.96 | 1785.95  | 0.01  | 0    | 87         | 2,60E-08 | R.NGDSGLLDVLEGLK.F        |
|       |              |               |             |                   |               |                  |          |                 |                     |                 |                 | 9              | 110   | 125 | 1911.92  | 1910.91 | 1910.89  | 0.02  | 1    | 23         | 1,00E-01 | K.SELRDFNSNNGFELNR.N      |
| TON1b | -dig         | AT5G18580     | FASS        | 5/5               | TAIR8         | 568              | 5,20E-53 | 4               | 45                  | 23              | 353             | 1              | 335   | 341 | 901.45   | 900.44  | 900.45   | -0.01 | 0    | 33         | 8,50E-03 | R.VFDEHVR.R               |
|       |              |               |             |                   |               |                  |          |                 |                     |                 |                 | 2              | 457   | 464 | 1002.46  | 1001.45 | 1001.45  | 0.00  | 0    | 30         | 9,20E-03 | R.GFWAHDNR.E              |
|       |              |               |             |                   |               |                  |          |                 |                     |                 |                 | 3              | 156   | 164 | 1120.52  | 1119.51 | 1119.51  | 0.00  | 0    | 31         | 1,10E-02 | R.FFFSPSNFMK.F            |
|       |              |               |             |                   |               |                  |          |                 |                     |                 |                 | 4              | 244   | 252 | 1272.57  | 1271.56 | 1271.55  | 0.01  | 0    | 21         | 7,30E-02 | K.FFFFCDPHR.R             |
|       |              |               |             |                   |               |                  |          |                 |                     |                 |                 | 5              | 369   | 379 | 1311.66  | 1310.65 | 1310.65  | 0.00  | 0    | 40         | 2,10E-03 | K.DTPEGLTYLFR.C           |
|       |              |               |             |                   |               |                  |          |                 |                     |                 |                 | 6              | 66    | 77  | 1327.66  | 1326.65 | 1326.65  | 0.00  | 0    | 18         | 3,20E-01 | K.SQEAGTIPSPFYK.K         |
|       |              |               |             |                   |               |                  |          |                 |                     |                 |                 | 7              | 444   | 456 | 1346.71  | 1345.7  | 1345.7   | 0.00  | 0    | 38         | 4,00E-03 | K.QGGTVASMLIDVR.G         |
|       |              |               |             |                   |               |                  |          |                 |                     |                 |                 | 8              | 18    | 29  | 1384.77  | 1383.77 | 1383.77  | 0.00  | 1    | 30         | 1,40E-02 | R.KIPPASSMLWVR.N          |
|       |              |               |             |                   |               |                  |          |                 |                     |                 |                 | 9              | 18    | 29  | 1400.77  | 1399.76 | 1399.76  | 0.00  | 1    | (2)        | 1,30E+01 | R.KIPPASSMLWVR.N          |
|       |              |               |             |                   |               |                  |          |                 |                     |                 |                 | 10             | 387   | 399 | 1477.78  | 1476.77 | 1476.77  | 0.00  | 0    | 50         | 2,30E-04 | R.GFLTADHSLFR.D           |
|       |              |               |             |                   |               |                  |          |                 |                     |                 |                 | 11             | 173   | 184 | 1514.84  | 1513.84 | 1513.84  | 0.00  | 0    | 3          | 7,20E+00 | R.IAILPPYLYVMR.T          |
|       |              |               |             |                   |               |                  |          |                 |                     |                 |                 | 12             | 227   | 238 | 1529.64  | 1528.63 | 1528.63  | 0.00  | 0    | 28         | 6,20E-03 | R.DMPFANQMYCR.I           |
|       |              |               |             |                   |               |                  |          |                 |                     |                 |                 | 13             | 321   | 334 | 1656.81  | 1655.8  | 1655.8   | 0.00  | 0    | 31         | 1,90E-02 | K.EYADGTLTEIFIER.V        |
| TON1b | -dig         | AT3G25800     | PP2AA2      | 4/5               | TAIR8         | 225              | 1,00E-18 | 6               | 36                  | 15              | 129             | 1              | 279   | 287 | 1047.58  | 1046.57 | 1046.58  | -0.01 | 0    | 27         | 5,20E-02 | R.TELVPAYVR.L             |
|       |              |               |             |                   |               |                  |          |                 |                     |                 |                 | 2              | 133   | 142 | 1121.57  | 1120.57 | 1120.57  | 0.00  | 0    | 38         | 4,20E-03 | R.LAAGEWFTAR.V            |
|       |              |               |             |                   |               |                  |          |                 |                     |                 |                 | 3              | 537   | 552 | 1787.02  | 1786.01 | 1786.02  | -0.01 | 0    | 23         | 2,20E-02 | K.VLQSLIPVDQSVVEK.T       |
|       |              |               |             |                   |               |                  |          |                 |                     |                 |                 | 4              | 310   | 325 | 1858.06  | 1857.06 | 1857.05  | 0.01  | 0    | 30         | 6,70E-03 | R.IILNPEIAIHLPCVK.E       |
| TON1b | -dig         | AT2G42500/AT3 | PP2A3/PP2A4 | 3/5               | TAIR8         | 218              | 5,20E-18 | 5               | 45                  | 11              | 131             | 5              | 259   | 278 | 2340.11  | 2339.1  | 2339.09  | 0.01  | 0    | 11         | 1,40E+00 | R.YMVANQLYELCEAVGPEPTR.T  |
|       |              |               |             |                   |               |                  |          |                 |                     |                 |                 | 1              | 287   | 298 | 1456.72  | 1455.71 | 1455.73  | -0.02 | 0    | 34         | 7,20E-03 | R.NHTFIQEPAPR.R           |
|       |              |               |             |                   |               |                  |          |                 |                     |                 |                 | 2              | 260   | 272 | 1589.78  | 1588.77 | 1588.77  | 0.00  | 0    | 42         | 1,30E-03 | K.VVTIFSAFNQYCR.C         |
|       |              |               |             |                   |               |                  |          |                 |                     |                 |                 | 3              | 219   | 239 | 2341.09  | 2340.08 | 2340.08  | 0.00  | 0    | 35         | 3,80E-03 | R.GAGYTFQDISEQFNHTNKL.L   |
|       |              |               |             |                   |               |                  |          |                 |                     |                 |                 | 4              | 54    | 74  | 2412.18  | 2411.17 | 2411.17  | 0.00  | 0    | 20         | 1,60E-01 | K.SPVTICGDIHQFDLAEI.LFR.I |
| TON1b | -dig         | AT1G13320     | PP2AA3      | 1/5               | TAIR8         | 74               | 1,40E-03 | 10              | 13                  | 6               | 50              | 1              | 133   | 142 | 1137.58  | 1136.57 | 1136.56  | 0.01  | 0    | 34         | 1,20E-02 | R.LSAGEWFTAR.V            |
|       |              |               |             |                   |               |                  |          |                 |                     |                 |                 | 2              | 259   | 278 | 2340.11  | 2339.1  | 2339.09  | 0.01  | 0    | 16         | 3,70E-01 | R.YMVANQLYELCEAVGPEPTR.T  |
|       |              |               |             |                   |               |                  |          |                 |                     |                 |                 | 3              | 259   | 278 | 2356.1   | 2355.1  | 2355.09  |       |      |            |          |                           |





Protein identification details were obtained with the 4800 MALDI TOF/TOF<sup>TM</sup> Proteomics analyzer (AB SCIEX) and the GPS explorer v3.6 (AB SCIEX) software package combined with search engine Mascot version 2.1 or 2.2 (Matrix Science)

Column headers for Protein and Peptide data are as follows :

**Protein score:** The score calculated by the Mascot search engine for each protein. This score is based on the probability that peptide mass matches are non-random events. If the Protein Score is equal to or greater than the Mascot® Significance Level calculated for the database search, the protein match is considered to be statistically non-random at the 95% confidence interval. Protein score =  $-10 \cdot \log(P)$ , where P is the probability that the observed match is a random event. **Expect:** Protein score expectation value. **RMS error (ppm):** RMS error of the set of matched mass values, in ppm. **Sequence coverage %:** Percentage of protein sequence covered by assigned peptide matches. **Unique peptides:** The number of peptides with unique sequences matching the selected protein. **Total Ion Score:** A score calculated by weighting Ion Scores for all individual peptides matched to a given protein. **Peptide Number:** Peptide index number within the list of peptides associated with a given protein. **Start:** The starting position of the peptide in the protein. **End:** The ending position of the peptide in the protein. **Observed:** The observed monoisotopic mass of the peptide in the spectrum (m/z). **Mr (Exp):** The experimental mass of the peptide calculated from the observed m/z value. **Mr (Calc):** The theoretical mass of the peptide based on its sequence. **Delta (Da):** The difference between the theoretical (Mr (Calc)) and experimental (Mr (Exp)) masses, in daltons. **Miss:** Number of missed Trypsin cleavage sites. **Ions score:** The Ions Score is calculated by the Mascot search engine for each peptide matched from MS/MS peak lists. This score is based on the probability that ion fragmentation matches are non-random events. If the Ion Score is equal to or greater than the Mascot® Significance Level calculated for the database search, the peptide match is considered to be statistically non-random at the 95% confidence interval. Ions score =  $-10 \cdot \log(P)$ , where P is the probability that the observed match is a random event. **Best Ions score:** The highest individual Ion Score for a given protein identification. **Expect:** Ions score expectation value. **Peptide:** The amino acid sequence of the selected peptide. **Variable Modification:** Variable modification type on the peptide.

**Supplementary Table S2: VELOS orbitrap analysis of TAP TON1b eluates**

| Accession        | Description        | Score                           | Coverage                                              | # Unique Peptides | # Peptides | # AAs      |            |                  |            |          |                    |
|------------------|--------------------|---------------------------------|-------------------------------------------------------|-------------------|------------|------------|------------|------------------|------------|----------|--------------------|
| <b>AT3G55005</b> | <b>TON1b</b>       | <b>237,09</b>                   | <b>64,20</b>                                          | <b>17</b>         | <b>18</b>  | <b>257</b> |            |                  |            |          |                    |
|                  | Peptide confidence | Sequence                        | Modifications                                         | Rank              | XCorr      | Charge     | MH+ [Da]   | $\Delta M$ [ppm] | m/z [Da]   | RT [min] | # Missed Cleavages |
|                  | High               | NEDSRPLLDVLEGLK                 |                                                       | 1                 | 4,69       | 3          | 1958,06035 | 0,47             | 653,35830  | 28,73    | 0                  |
|                  | High               | NEDSRPLLDVLeGFLK                | E13(Methyl)                                           | 1                 | 4,48       | 3          | 1972,07370 | -0,69            | 658,02942  | 29,64    | 0                  |
|                  | High               | NEDSRPLLDVLEGLKFENmTQVMGGSSR    | M21(Oxidation)                                        | 1                 | 4,48       | 4          | 3398,66884 | -0,95            | 850,42267  | 29,10    | 1                  |
|                  | High               | ASVFEAIEEEDRVIEENEGPLPALLGScNDR | C28(Carbamidomethyl)                                  | 1                 | 4,43       | 4          | 3443,63776 | -0,23            | 861,66490  | 26,02    | 1                  |
|                  | High               | SEIRDFSIINNGYeLNR               | E13(Methyl)                                           | 1                 | 4,13       | 3          | 1940,94687 | 0,37             | 647,65381  | 21,77    | 1                  |
|                  | High               | RSVSASQASGAATSGYR               |                                                       | 1                 | 4,08       | 2          | 1655,80777 | -1,14            | 828,40752  | 17,14    | 1                  |
|                  | High               | FENmTQVMGGSSR                   | M4(Oxidation); M8(Oxidation)                          | 1                 | 3,79       | 2          | 1475,62496 | -0,32            | 738,31612  | 17,30    | 0                  |
|                  | High               | VIeNNeGLPALLGScNDR              | E3(Methyl); E6(Methyl); C16(Carbamidomethyl)          | 1                 | 3,74       | 2          | 2096,04546 | 0,61             | 1048,52637 | 23,56    | 0                  |
|                  | High               | LLSALlCeYLDWAQLNHTLK            | C7(Carbamidomethyl)                                   | 1                 | 3,68       | 2          | 2401,25728 | -0,51            | 1201,13228 | 27,13    | 0                  |
|                  | High               | YDTEdMPEEVmR                    | M6(Oxidation); M11(Oxidation)                         | 1                 | 3,65       | 2          | 1546,60247 | -0,78            | 773,80487  | 18,49    | 0                  |
|                  | High               | ASVFEAIEEEDRVIEENeGLPALLGScNDR  | E18(Methyl); C28(Carbamidomethyl)                     | 1                 | 3,60       | 3          | 3457,65342 | -0,22            | 1153,22266 | 27,17    | 1                  |
|                  | High               | ASTALENLQLDRK                   |                                                       | 1                 | 3,58       | 2          | 1458,78997 | -0,81            | 729,89862  | 20,22    | 1                  |
|                  | High               | FeNMTQVMGGSSR                   | E2(Methyl)                                            | 1                 | 3,55       | 2          | 1457,65068 | -0,38            | 729,32898  | 21,93    | 0                  |
|                  | High               | SEIRDFSIINNGYeLNR               |                                                       | 1                 | 3,55       | 3          | 1926,93133 | 0,43             | 642,98196  | 21,38    | 1                  |
|                  | High               | VIENNEGLPALLGScNDR              | C16(Carbamidomethyl)                                  | 1                 | 3,54       | 3          | 2068,01265 | -0,11            | 690,00907  | 22,47    | 0                  |
|                  | High               | ReSETESSSLDTR                   | E2(Methyl)                                            | 1                 | 3,53       | 2          | 1623,78048 | -1,00            | 812,39388  | 19,08    | 1                  |
|                  | High               | NedSRPLLDVLEGLK                 | E2(Methyl); D3(Methyl)                                | 1                 | 3,48       | 2          | 1986,08820 | -1,27            | 993,54774  | 29,20    | 0                  |
|                  | High               | ESETESSSLDTR                    |                                                       | 1                 | 3,46       | 2          | 1453,66570 | 0,25             | 727,33649  | 20,03    | 0                  |
|                  | High               | ASTALENLQLDR                    |                                                       | 1                 | 3,39       | 2          | 1330,69585 | -0,25            | 665,85156  | 21,68    | 0                  |
|                  | High               | SVSASQASGAATSGYR                |                                                       | 1                 | 3,39       | 2          | 1499,70744 | -0,73            | 750,35736  | 18,20    | 0                  |
|                  | High               | eSETESSSLDTR                    | E1(Methyl)                                            | 1                 | 3,38       | 2          | 1467,68340 | 1,65             | 734,34534  | 20,09    | 0                  |
|                  | High               | FENmTQVMGGSSR                   | M4(Oxidation)                                         | 1                 | 3,37       | 2          | 1459,62924 | -0,87            | 730,31826  | 18,99    | 0                  |
|                  | High               | YDTEdMPEeVMR                    | M6(Oxidation); E9(Methyl)                             | 1                 | 3,23       | 2          | 1544,62241 | -1,30            | 772,81485  | 20,28    | 0                  |
|                  | High               | ASTALENLQLDR                    | E6(Methyl)                                            | 1                 | 3,20       | 2          | 1344,71044 | -1,03            | 672,85886  | 21,40    | 0                  |
|                  | High               | DFSINNGYeLNR                    |                                                       | 1                 | 3,20       | 2          | 1441,67035 | -0,23            | 721,33881  | 22,28    | 0                  |
|                  | High               | YDTEdMPEEVmR                    |                                                       | 1                 | 3,14       | 2          | 1514,61221 | -1,09            | 757,80974  | 21,49    | 0                  |
|                  | High               | SSASDSLPHQR                     |                                                       | 1                 | 3,14       | 2          | 1184,56520 | -0,24            | 592,78624  | 16,35    | 0                  |
|                  | High               | eSeTESSSLDTR                    | E1(Methyl); E3(Methyl)                                | 1                 | 3,13       | 2          | 1481,69475 | -1,27            | 741,35101  | 21,14    | 0                  |
|                  | High               | YDTEdMPEeVMR                    | M6(Oxidation); E8(Methyl); E9(Methyl)                 | 1                 | 3,11       | 2          | 1558,63833 | -1,12            | 779,82280  | 20,89    | 0                  |
|                  | High               | YDTEdMPEEVmR                    | M6(Oxidation)                                         | 1                 | 2,96       | 2          | 1530,60719 | -1,03            | 765,80723  | 19,74    | 0                  |
|                  | High               | ASVFEAIEEEdR                    | D11(Methyl)                                           | 1                 | 2,96       | 2          | 1408,65850 | -0,45            | 704,83289  | 24,03    | 0                  |
|                  | High               | ASVFEAIEEEDR                    |                                                       | 1                 | 2,92       | 3          | 1394,64457 | 0,77             | 465,55304  | 23,22    | 0                  |
|                  | High               | ASVFEAIEeEDRVIEENEGPLPALLGScNDR | E9(Methyl); E10(Methyl); C28(Carbamidomethyl)         | 1                 | 2,91       | 4          | 3471,66665 | -0,92            | 868,67212  | 26,83    | 1                  |
|                  | High               | RSSASDSLPHQR                    |                                                       | 1                 | 2,88       | 2          | 1340,66502 | -1,18            | 670,83615  | 15,96    | 1                  |
|                  | High               | YDTEdMPEeVmR                    | M6(Oxidation); E8(Methyl); E9(Methyl); M11(Oxidation) | 1                 | 2,87       | 2          | 1574,63445 | -0,34            | 787,82086  | 19,71    | 0                  |
|                  | High               | YDTEdMPEEVmR                    | E4(Methyl); M6(Oxidation); M11(Oxidation)             | 1                 | 2,85       | 2          | 1560,61769 | -1,05            | 780,81248  | 18,77    | 0                  |
|                  | High               | RESeTESSSLDTR                   | E4(Methyl); E6(Methyl)                                | 1                 | 2,83       | 3          | 1637,79674 | -0,62            | 546,60376  | 19,58    | 1                  |
|                  | High               | FeNmTQVMGGSSR                   | E2(Methyl); M4(Oxidation)                             | 1                 | 2,82       | 2          | 1473,64531 | -0,57            | 737,32629  | 19,37    | 0                  |
|                  | High               | VIENNeGLPALLGScNDR              | E6(Methyl); C16(Carbamidomethyl)                      | 1                 | 2,81       | 3          | 2082,02652 | -0,97            | 694,68036  | 22,75    | 0                  |
|                  | High               | DFSINNGYeLNR                    | E9(Methyl)                                            | 1                 | 2,80       | 2          | 1455,68541 | -0,63            | 728,34634  | 22,51    | 0                  |
|                  | High               | RESETESSSLDTR                   |                                                       | 1                 | 2,80       | 2          | 1609,76513 | -0,82            | 805,38620  | 19,23    | 1                  |
|                  | High               | YDTEdMPEEVmR                    | E4(Methyl)                                            | 1                 | 2,52       | 2          | 1528,62847 | -0,68            | 764,81787  | 22,07    | 0                  |
|                  | High               | ASVFEAIEeEDR                    | E8(Methyl); E9(Methyl); E10(Methyl)                   | 1                 | 2,39       | 2          | 1436,68880 | -1,14            | 718,84804  | 25,31    | 0                  |
| <b>AT3G55000</b> | <b>TON1a</b>       | <b>129,58</b>                   | <b>60,00</b>                                          | <b>13</b>         | <b>14</b>  | <b>260</b> |            |                  |            |          |                    |
|                  | Peptide confidence | Sequence                        | Modifications                                         | Rank              | XCorr      | Charge     | MH+ [Da]   | $\Delta M$ [ppm] | m/z [Da]   | RT [min] | # Missed Cleavages |
|                  | High               | ASVFEAIEEEDRVIEENEGPPALLGScNDR  | C28(Carbamidomethyl)                                  | 1                 | 5,27       | 3          | 3427,60361 | -1,06            | 1143,20605 | 25,47    | 1                  |
|                  | High               | LLSALlCeYLDWAQLNHTLlVYQPESNLPK  | C7(Carbamidomethyl)                                   | 1                 | 4,89       | 3          | 3541,84348 | 0,96             | 1181,28601 | 28,02    | 0                  |
|                  | High               | NGDSGPLLDVLeGFLK                | E13(Methyl)                                           | 1                 | 4,82       | 2          | 1800,97258 | -0,95            | 900,98993  | 31,08    | 0                  |
|                  | High               | NGDSGPLLDVLEGLK                 |                                                       | 1                 | 4,53       | 3          | 1786,95831 | -0,18            | 596,32429  | 30,35    | 0                  |
|                  | High               | SELRDFNSNNGFELNR                |                                                       | 1                 | 4,47       | 3          | 1911,89481 | 0,18             | 637,96979  | 21,01    | 1                  |
|                  | High               | VIeNNeGPPALLGScNDR              | E3(Methyl); C16(Carbamidomethyl)                      | 1                 | 4,09       | 2          | 2065,99785 | 0,30             | 1033,50256 | 21,50    | 0                  |
|                  | High               | DSETESSSSLESR                   |                                                       | 1                 | 3,99       | 2          | 1413,59636 | -0,91            | 707,30182  | 17,68    | 0                  |

|                  |                                |                                     |              |           |           |            |       |            |       |   |
|------------------|--------------------------------|-------------------------------------|--------------|-----------|-----------|------------|-------|------------|-------|---|
| High             | ASVFEAIEEEDRVIEENEGPPALLGScNDR | E15(Methyl); C28(Carbamidomethyl)   | 1            | 3,95      | 3         | 3441,62063 | -0,66 | 1147,87839 | 25,03 | 1 |
| High             | RDESETSSSSLESr                 |                                     | 1            | 3,33      | 3         | 1569,69815 | -0,39 | 523,90424  | 16,67 | 1 |
| High             | VIENNEGPPALLGScNDR             | C16(Carbamidomethyl)                | 1            | 3,32      | 2         | 2051,97952 | -1,01 | 1026,49340 | 21,15 | 0 |
| High             | SSASDSLPPQR                    |                                     | 1            | 3,31      | 2         | 1144,55866 | -0,60 | 572,78297  | 17,35 | 0 |
| High             | RDESETSSSSLeSR                 | E12(Methyl)                         | 1            | 3,31      | 3         | 1583,71410 | -0,20 | 528,57622  | 16,82 | 1 |
| High             | FESmTQmGSSSR                   | M4(Oxidation); M8(Oxidation)        | 1            | 3,30      | 2         | 1436,57681 | -0,92 | 718,79204  | 16,35 | 0 |
| High             | DFNSNNGFELNR                   |                                     | 1            | 3,28      | 2         | 1426,63337 | -0,89 | 713,82032  | 21,74 | 0 |
| High             | RSSASDSLPPQR                   |                                     | 1            | 3,24      | 2         | 1300,65837 | -1,61 | 650,83282  | 16,58 | 1 |
| High             | dSETSSSSLESr                   | D1(Methyl)                          | 1            | 3,09      | 2         | 1427,61283 | -0,32 | 714,31005  | 17,43 | 0 |
| High             | RPVSASQASDR                    |                                     | 1            | 2,98      | 2         | 1173,59650 | -0,53 | 587,30189  | 15,45 | 0 |
| High             | ASVFEAIEEEdR                   | D11(Methyl)                         | 1            | 2,96      | 2         | 1408,65850 | -0,45 | 704,83289  | 24,03 | 0 |
| High             | ASVFEAIEEEDR                   |                                     | 1            | 2,92      | 3         | 1394,64457 | 0,77  | 465,55304  | 23,22 | 0 |
| High             | FESMTQmGSSSR                   | M8(Oxidation)                       | 1            | 2,87      | 2         | 1420,58199 | -0,87 | 710,79463  | 17,67 | 0 |
| High             | QGNQDTHeeVTR                   | E9(Methyl)                          | 1            | 2,53      | 2         | 1427,64940 | -1,13 | 714,32834  | 16,28 | 0 |
| High             | ASVFEAIEeeDR                   | E8(Methyl); E9(Methyl); E10(Methyl) | 1            | 2,39      | 2         | 1436,68880 | -1,14 | 718,84804  | 25,31 | 0 |
| <b>AT5G18580</b> | <b>FASS</b>                    | <b>127,05</b>                       | <b>67,50</b> | <b>22</b> | <b>22</b> | <b>480</b> |       |            |       |   |

| Peptide confidence | Sequence                              | Modifications                                          | Rank         | XCorr     | Charge    | MH+ [Da]   | ΔM [ppm] | m/z [Da]   | RT [min] | # Missed Cleavages |
|--------------------|---------------------------------------|--------------------------------------------------------|--------------|-----------|-----------|------------|----------|------------|----------|--------------------|
| High               | EmDFDSFLDFVLALENK                     | M2(Oxidation)                                          | 1            | 4,90      | 2         | 2048,94927 | -1,45    | 1024,97827 | 30,00    | 0                  |
| High               | QELKEYADGTLTEIFIER                    |                                                        | 1            | 4,89      | 3         | 2155,09128 | -0,26    | 719,03528  | 24,03    | 1                  |
| High               | MNYEDFCHIASVcTEQIGPK                  | C7(Carbamidomethyl); C13(Carbamidomethyl)              | 1            | 4,82      | 3         | 2399,04288 | -1,53    | 800,35248  | 22,80    | 0                  |
| High               | YIGSGAGLGSEALMELETK                   |                                                        | 1            | 4,44      | 2         | 1925,95305 | 0,25     | 963,48016  | 24,17    | 0                  |
| High               | KKPEEGSISQR                           |                                                        | 1            | 4,27      | 3         | 1258,67521 | 0,12     | 420,22992  | 15,40    | 1                  |
| High               | mNYEDFCHIASVcTEQIGPK                  | (Oxidation); C7(Carbamidomethyl); C13(Carbamidomethyl) | 1            | 3,99      | 3         | 2415,03824 | -1,34    | 805,68427  | 21,90    | 0                  |
| High               | IcDmFLALDKDmSGSLcK                    | domethyl); M4(Oxidation); M12(Oxidation); C17(Carba    | 1            | 3,93      | 2         | 2135,94780 | -0,15    | 1068,47754 | 21,84    | 1                  |
| High               | QSDLLNADDLAAMWvcLR                    | C17(Carbamidomethyl)                                   | 1            | 3,93      | 3         | 2204,08261 | -0,61    | 735,36572  | 28,42    | 0                  |
| High               | YIGSGAGLGSEALMeLETK                   | M14(Oxidation); E15(Methyl)                            | 1            | 3,86      | 2         | 1955,96282 | -0,16    | 978,48505  | 24,45    | 0                  |
| High               | YIGSGAGLGSEALmELETK                   | M14(Oxidation)                                         | 1            | 3,78      | 2         | 1941,94621 | -0,65    | 971,47675  | 23,73    | 0                  |
| High               | IDmSELDESDGFLHSDemESYIGGLIPNLAQLR     | M3(Oxidation)                                          | 1            | 3,70      | 3         | 3825,73899 | -2,14    | 1275,91785 | 27,76    | 0                  |
| High               | IcDMFLALDKDmSGSLcK                    | Carbamidomethyl); M12(Oxidation); C17(Carbamidome      | 1            | 3,64      | 2         | 2119,94902 | -1,97    | 1060,47815 | 23,11    | 1                  |
| High               | KIPPASmLWVR                           | M8(Oxidation)                                          | 1            | 3,51      | 3         | 1400,77150 | -0,32    | 467,59535  | 20,34    | 1                  |
| High               | ILLSNLQELMELHQESEEEVTDTEQAENWFLSTSAQR | C6(Carbamidomethyl); M11(Oxidation)                    | 1            | 3,44      | 4         | 4524,07680 | -1,13    | 1131,77466 | 26,34    | 0                  |
| High               | WIEGGNYELcIEDVR                       | C10(Carbamidomethyl)                                   | 1            | 3,43      | 2         | 1852,85307 | -0,23    | 926,93018  | 23,67    | 0                  |
| High               | QGGTVASmLIDVR                         | M8(Oxidation)                                          | 1            | 3,37      | 2         | 1362,70378 | -0,64    | 681,85553  | 21,77    | 0                  |
| High               | IDmSELDESDGFLHSDemESYIGGLIPNLAQLR     | M3(Oxidation); M19(Oxidation)                          | 1            | 3,35      | 3         | 3841,74643 | 1,13     | 1281,25366 | 26,33    | 0                  |
| High               | IAILPFYLYVmR                          | M11(Oxidation)                                         | 1            | 3,34      | 2         | 1514,84295 | -0,71    | 757,92511  | 26,65    | 0                  |
| High               | DmPPAFNQMyCr                          | M2(Oxidation); C11(Carbamidomethyl)                    | 1            | 3,21      | 2         | 1545,62773 | -0,43    | 773,31750  | 21,30    | 0                  |
| High               | IAILPFYLYVMR                          |                                                        | 1            | 3,16      | 2         | 1498,84734 | -1,18    | 749,92731  | 27,98    | 0                  |
| High               | DmPPAFNQmYcR                          | M2(Oxidation); M9(Oxidation); C11(Carbamidomethyl)     | 1            | 3,13      | 2         | 1561,62419 | 0,57     | 781,31573  | 19,81    | 0                  |
| High               | GFWAHDNRENLLQEEEEPEEESQ               |                                                        | 1            | 3,13      | 3         | 2912,25840 | -0,78    | 971,42432  | 22,16    | 1                  |
| High               | mNYeDFCHIASVcTEQIGPK                  | tion); E4(Methyl); C7(Carbamidomethyl); C13(Carbami    | 1            | 3,03      | 3         | 2429,05442 | -1,11    | 810,35632  | 22,33    | 0                  |
| High               | SQEAGTIPSFYK                          |                                                        | 1            | 2,99      | 2         | 1327,65325 | 0,26     | 664,33026  | 21,27    | 0                  |
| High               | IcDMFLALDK                            | C2(Carbamidomethyl)                                    | 1            | 2,92      | 2         | 1225,59514 | -0,39    | 613,30121  | 24,30    | 0                  |
| High               | YIGSGAGLGSEALMeLeTK                   | M14(Oxidation); E15(Methyl); E17(Methyl)               | 1            | 2,89      | 2         | 1969,97820 | -0,30    | 985,49274  | 25,07    | 0                  |
| High               | EYADGTLTEIFIER                        |                                                        | 1            | 2,89      | 3         | 1656,81076 | -0,51    | 552,94177  | 24,89    | 0                  |
| High               | ITLGDLLGcK                            | C9(Carbamidomethyl)                                    | 1            | 2,69      | 2         | 1089,59714 | -0,16    | 545,30221  | 24,73    | 0                  |
| High               | ILLEIFK                               |                                                        | 1            | 2,63      | 2         | 875,55997  | -0,17    | 438,28362  | 24,56    | 0                  |
| High               | QGGTVASMLIDVR                         |                                                        | 1            | 2,61      | 2         | 1346,70891 | -0,62    | 673,85809  | 23,55    | 0                  |
| High               | IcDmFLALDK                            | C2(Carbamidomethyl); M4(Oxidation)                     | 1            | 2,56      | 2         | 1241,58916 | -1,10    | 621,29822  | 22,61    | 0                  |
| High               | ENCVIDDATGAeK                         | C3(Carbamidomethyl); E12(Methyl)                       | 1            | 2,46      | 2         | 1435,63603 | -0,69    | 718,32166  | 20,31    | 0                  |
| High               | KPEEGSISQR                            |                                                        | 1            | 2,42      | 2         | 1130,57930 | -0,69    | 565,79329  | 15,93    | 0                  |
| <b>AT3G25800</b>   | <b>PP2AA2</b>                         | <b>98,25</b>                                           | <b>44,63</b> | <b>10</b> | <b>16</b> | <b>587</b> |          |            |          |                    |

| Peptide confidence | Sequence               | Modifications                                       | Rank | XCorr | Charge | MH+ [Da]   | ΔM [ppm] | m/z [Da]   | RT [min] | # Missed Cleavages |
|--------------------|------------------------|-----------------------------------------------------|------|-------|--------|------------|----------|------------|----------|--------------------|
| High               | LAIIIEYIPLLASQLGVGFDDK |                                                     | 1    | 5,62  | 3      | 2422,32859 | 0,68     | 808,11438  | 31,48    | 0                  |
| High               | YmVANQLYLcEAVGPEPTR    | M2(Oxidation); C11(Carbamidomethyl)                 | 1    | 4,92  | 2      | 2356,09331 | -0,67    | 1178,55029 | 23,66    | 0                  |
| High               | TDVMsmFEDLTQDDQDSVR    | M6(Oxidation)                                       | 1    | 4,57  | 2      | 2247,93486 | -1,46    | 1124,47107 | 24,43    | 0                  |
| High               | FFANQALQSIDNVmMSS      | M15(Oxidation)                                      | 1    | 4,40  | 2      | 1918,87187 | 2,30     | 959,93958  | 27,11    | 0                  |
| High               | FFANQALQSIDNVmMSS      | M14(Oxidation); M15(Oxidation)                      | 1    | 4,10  | 2      | 1934,86165 | -0,37    | 967,93446  | 24,43    | 0                  |
| High               | SLYTQLcQDDmPmVR        | C7(Carbamidomethyl); M11(Oxidation); M13(Oxidation) | 1    | 4,07  | 2      | 1888,82247 | -0,74    | 944,91487  | 21,55    | 0                  |
| High               | SALASVImGmAPVLGK       | M8(Oxidation); M10(Oxidation)                       | 1    | 4,00  | 3      | 1576,84348 | -0,22    | 526,28601  | 22,87    | 0                  |

|                    |                        |                                     |              |           |           |            |       |            |       |   |
|--------------------|------------------------|-------------------------------------|--------------|-----------|-----------|------------|-------|------------|-------|---|
| High               | LAIIEYIPLLASQLGVGFDDK  | D21(Methyl)                         | 1            | 3,98      | 3         | 2436,33982 | -1,14 | 812,78479  | 31,43 | 0 |
| High               | TIRPGLVELSEDPDVR       |                                     | 1            | 3,82      | 2         | 2010,05022 | -0,05 | 1005,52875 | 21,89 | 0 |
| High               | ILNPEIAIQHILPcVK       | C14(Carbamidomethyl)                | 1            | 3,78      | 2         | 1858,06035 | -0,88 | 929,53381  | 24,89 | 0 |
| High               | VLQSLIPIVDQSVVEK       |                                     | 1            | 3,76      | 3         | 1767,02597 | -0,19 | 589,68018  | 24,53 | 0 |
| High               | SALASVImGMAPVLGK       | M8(Oxidation)                       | 1            | 3,65      | 2         | 1560,84636 | -1,63 | 780,92682  | 25,63 | 0 |
| High               | TIRPGLVELSeDPDVR       | E11(Methyl)                         | 1            | 3,44      | 3         | 2024,06595 | -0,01 | 675,36017  | 22,51 | 0 |
| High               | LLEPQDcVQHILPVIvNFSQDK | C7(Carbamidomethyl)                 | 1            | 3,32      | 3         | 2592,34824 | -0,35 | 864,78760  | 25,31 | 0 |
| High               | AVSLAPVmgSEITcSK       | M9(Oxidation); C15(Carbamidomethyl) | 1            | 3,31      | 2         | 1778,90068 | -1,18 | 889,95398  | 22,42 | 0 |
| High               | ESLDVDFHLSLVK          |                                     | 1            | 3,29      | 2         | 1501,78813 | -1,08 | 751,39771  | 25,17 | 0 |
| High               | LLRDNEAEVR             |                                     | 1            | 2,93      | 2         | 1214,64739 | -1,20 | 607,82733  | 17,65 | 1 |
| High               | VSAcGVFHIAyPSAPDmLK    | C4(Carbamidomethyl); M17(Oxidation) | 1            | 2,62      | 2         | 2079,00127 | -1,26 | 1040,00427 | 22,52 | 0 |
| High               | FAATVeSAHLK            | E6(Methyl)                          | 1            | 2,61      | 2         | 1187,64128 | -0,56 | 594,32428  | 19,47 | 0 |
| High               | ELSSDSSQHVR            |                                     | 1            | 2,59      | 2         | 1244,58501 | -1,29 | 622,79614  | 16,21 | 0 |
| <b>AT3G06810.1</b> | <b>IBR3</b>            | <b>86,92</b>                        | <b>36,65</b> | <b>19</b> | <b>19</b> | <b>824</b> |       |            |       |   |

| Peptide confidence | Sequence                 | Modifications                        | Rank         | XCorr     | Charge    | MH+ [Da]   | ΔM [ppm] | m/z [Da]   | RT [min] | # Missed Cleavages |
|--------------------|--------------------------|--------------------------------------|--------------|-----------|-----------|------------|----------|------------|----------|--------------------|
| High               | VSQFGHGQSNPTFLIEVGSGLSKR |                                      | 1            | 4,98      | 3         | 2632,35056 | 1,01     | 878,12170  | 21,69    | 1                  |
| High               | SGFAmTEPQVASSDATNIEcSIR  | M5(Oxidation); C20(Carbamidomethyl)  | 1            | 4,74      | 2         | 2487,11235 | -0,16    | 1244,05981 | 21,82    | 0                  |
| High               | ALASLHSADVDAIGLEK        |                                      | 1            | 4,56      | 2         | 1709,90544 | -0,87    | 855,45636  | 21,30    | 0                  |
| High               | IADGPDEVHLGTIGK          |                                      | 1            | 4,36      | 2         | 1521,78942 | -0,93    | 761,39835  | 20,50    | 0                  |
| High               | NTGVQANELVESALGYIAR      |                                      | 1            | 4,26      | 2         | 2005,03667 | 0,84     | 1003,02197 | 26,06    | 0                  |
| High               | NIPAEDSTGATSGLVHGDFR     |                                      | 1            | 4,14      | 2         | 2043,97295 | -0,08    | 1022,49011 | 20,79    | 0                  |
| High               | FAADNVSGFPTNPSQFK        |                                      | 1            | 4,09      | 2         | 1826,86897 | -1,04    | 913,93812  | 22,32    | 0                  |
| High               | YGNKEQISEWLIPLLEGR       |                                      | 1            | 3,92      | 3         | 2145,13547 | 0,70     | 715,71667  | 26,20    | 1                  |
| High               | EGLWNLFPVDSAAR           |                                      | 1            | 3,90      | 2         | 1673,86363 | -0,62    | 837,43545  | 27,07    | 0                  |
| High               | ELAATENKHNLGK            |                                      | 1            | 3,76      | 2         | 1511,77995 | -0,90    | 756,39362  | 16,56    | 1                  |
| High               | SFDQLFGEGLTNLEYGlcEImGR  | C19(Carbamidomethyl); M22(Oxidation) | 1            | 3,76      | 3         | 2828,28916 | -0,55    | 943,43457  | 28,54    | 0                  |
| High               | FIAQHGSFVSDLAk           |                                      | 1            | 3,76      | 2         | 1519,78874 | -1,10    | 760,39801  | 21,01    | 0                  |
| High               | VSQFGHGQSNPTFLIEVGSGLSK  |                                      | 1            | 3,39      | 3         | 2476,24308 | -1,50    | 826,08588  | 22,61    | 0                  |
| High               | SWWAPQVfNcGAPDTGNmEVILR  | C10(Carbamidomethyl); M18(Oxidation) | 1            | 3,19      | 3         | 2577,21970 | -1,12    | 859,74475  | 24,01    | 0                  |
| High               | FmETHIYPmENEFSK          | M2(Oxidation); M9(Oxidation)         | 1            | 2,99      | 2         | 1934,82915 | -0,44    | 967,91821  | 20,30    | 0                  |
| High               | LLVLEAADHLDK             |                                      | 1            | 2,98      | 2         | 1336,74687 | -0,22    | 668,87708  | 22,20    | 0                  |
| High               | WlmgNASAGER              | M3(Oxidation)                        | 1            | 2,90      | 2         | 1207,55156 | -0,78    | 604,27942  | 19,23    | 0                  |
| High               | QGDSYVINGTK              |                                      | 1            | 2,78      | 2         | 1181,57939 | -0,29    | 591,29333  | 18,90    | 0                  |
| High               | mFELVDWLR                | M1(Oxidation)                        | 1            | 2,67      | 2         | 1224,60784 | -0,32    | 612,80756  | 26,26    | 0                  |
| High               | FMETHIYPmENEFSK          | M9(Oxidation)                        | 1            | 2,63      | 2         | 1918,83464 | -0,23    | 959,92096  | 21,06    | 0                  |
| <b>AT3G53540</b>   | <b>TRM19</b>             | <b>48,20</b>                         | <b>19,16</b> | <b>12</b> | <b>12</b> | <b>924</b> |          |            |          |                    |

| Peptide confidence | Sequence                | Modifications | Rank         | XCorr    | Charge    | MH+ [Da]   | ΔM [ppm] | m/z [Da]   | RT [min] | # Missed Cleavages |
|--------------------|-------------------------|---------------|--------------|----------|-----------|------------|----------|------------|----------|--------------------|
| High               | SHSSYNSPEVSITPSSLK      |               | 1            | 4,62     | 2         | 2006,96501 | -0,79    | 1003,98615 | 19,96    | 0                  |
| High               | EFNDALEALDSNKDLLK       |               | 1            | 4,55     | 2         | 2048,05571 | 0,48     | 1024,53149 | 24,33    | 1                  |
| High               | ELQWLSLEDDIEIIGR        |               | 1            | 4,09     | 2         | 1928,99358 | -1,51    | 965,00043  | 27,33    | 0                  |
| High               | VNANLTQAEMAFIR          |               | 1            | 3,84     | 2         | 1577,80950 | -0,65    | 789,40839  | 23,49    | 0                  |
| High               | HASYDTIDLpNEELR         |               | 1            | 3,82     | 2         | 1772,84490 | -0,08    | 886,92609  | 21,28    | 0                  |
| High               | TAmSSEALDLSTVTSVTDpDISR | M3(Oxidation) | 1            | 3,59     | 2         | 2412,14263 | -0,88    | 1206,57495 | 23,27    | 0                  |
| High               | LmGLDVLPSQSSSHK         | M2(Oxidation) | 1            | 3,57     | 2         | 1614,81304 | -1,62    | 807,91016  | 20,74    | 0                  |
| High               | LTHKFEHEIEISR           |               | 1            | 3,28     | 4         | 1638,85903 | -0,53    | 410,47021  | 18,39    | 1                  |
| High               | KLLFDQISR               |               | 1            | 2,92     | 3         | 1119,65165 | -0,42    | 373,88873  | 21,21    | 1                  |
| High               | TFASPSSSDFEFR           |               | 1            | 2,87     | 2         | 1417,62322 | 0,10     | 709,31525  | 20,06    | 0                  |
| High               | FLQHPDSLFTK             |               | 1            | 2,74     | 2         | 1332,69646 | 1,31     | 666,85187  | 21,15    | 0                  |
| High               | FKDVFVLDLAK             |               | 1            | 2,62     | 2         | 1310,69878 | -0,28    | 655,85303  | 23,37    | 1                  |
| <b>AT1G13320</b>   | <b>PP2AA3</b>           | <b>45,71</b>  | <b>26,92</b> | <b>3</b> | <b>10</b> | <b>587</b> |          |            |          |                    |

| Peptide confidence | Sequence              | Modifications                                       | Rank | XCorr | Charge | MH+ [Da]   | ΔM [ppm] | m/z [Da]   | RT [min] | # Missed Cleavages |
|--------------------|-----------------------|-----------------------------------------------------|------|-------|--------|------------|----------|------------|----------|--------------------|
| High               | YmVANQLYELcEAVGPEPTR  | M2(Oxidation); C11(Carbamidomethyl)                 | 1    | 4,92  | 2      | 2356,09331 | -0,67    | 1178,55029 | 23,66    | 0                  |
| High               | SALASVImGmAPVLGK      | M8(Oxidation); M10(Oxidation)                       | 1    | 4,00  | 3      | 1576,84348 | -0,22    | 526,28601  | 22,87    | 0                  |
| High               | LAIIEYIPLLASQLGVGFDEK |                                                     | 2    | 3,98  | 3      | 2436,33982 | -1,14    | 812,78479  | 31,43    | 0                  |
| High               | SIYGQLcQDDmPmVr       | C7(Carbamidomethyl); M11(Oxidation); M13(Oxidation) | 1    | 3,84  | 2      | 1844,79436 | -1,79    | 922,90082  | 21,03    | 0                  |
| High               | ILNPEIAIQHILPcVK      | C14(Carbamidomethyl)                                | 1    | 3,78  | 2      | 1858,06035 | -0,88    | 929,53381  | 24,89    | 0                  |
| High               | SALASVImGMAPVLGK      | M8(Oxidation)                                       | 1    | 3,65  | 2      | 1560,84636 | -1,63    | 780,92682  | 25,63    | 0                  |
| High               | YFANQLQSDINvmSS       | M14(Oxidation); M15(Oxidation)                      | 1    | 3,39  | 2      | 1950,85198 | -2,71    | 975,92963  | 23,81    | 0                  |
| High               | AVSLAPVmgSEITcSK      | M9(Oxidation); C15(Carbamidomethyl)                 | 1    | 3,31  | 2      | 1778,90068 | -1,18    | 889,95398  | 22,42    | 0                  |



|                  |                    |                                     |                                                    |           |           |            |            |          |            |          |                    |
|------------------|--------------------|-------------------------------------|----------------------------------------------------|-----------|-----------|------------|------------|----------|------------|----------|--------------------|
|                  | High               | ESDLVEHFTPLAK                       |                                                    | 1         | 2,65      | 2          | 1485,75713 | -0,89    | 743,38220  | 21,97    | 0                  |
|                  | High               | ELSSDSSQHVR                         |                                                    | 1         | 2,59      | 2          | 1244,58501 | -1,29    | 622,79614  | 16,21    | 0                  |
|                  | High               | FAATIESAHLK                         |                                                    | 2         | 2,55      | 2          | 1187,64128 | -0,56    | 594,32428  | 19,47    | 0                  |
| <b>AT3G58500</b> | <b>PP2A-4</b>      | <b>41,53</b>                        | <b>45,37</b>                                       | <b>10</b> | <b>10</b> | <b>313</b> |            |          |            |          |                    |
|                  | Peptide confidence | Sequence                            | Modifications                                      | Rank      | XCorr     | Charge     | MH+ [Da]   | ΔM [ppm] | m/z [Da]   | RT [min] | # Missed Cleavages |
|                  | High               | GAGYTFGQDISEQFNHTNNLK               |                                                    | 1         | 4,78      | 2          | 2341,08257 | -0,80    | 1171,04492 | 22,30    | 0                  |
|                  | High               | cPDTNYLFmGDYVDR                     | C1(Carbamidomethyl)                                | 1         | 4,51      | 2          | 1865,78093 | -1,30    | 933,39410  | 24,23    | 0                  |
|                  | High               | GYYSVETVTLVGLK                      |                                                    | 1         | 4,37      | 2          | 1641,90911 | -0,45    | 821,45819  | 25,96    | 0                  |
|                  | High               | SPVTIcGDIHGQFHDLAELFR               | C6(Carbamidomethyl)                                | 1         | 3,71      | 3          | 2412,17466 | -0,80    | 804,72974  | 24,54    | 0                  |
|                  | High               | cPDTNYLFmGDYVDR                     | C1(Carbamidomethyl); M9(Oxidation)                 | 1         | 3,55      | 2          | 1881,77556 | -1,45    | 941,39142  | 22,89    | 0                  |
|                  | High               | AHQLVmDGFNWAHEQK                    | M6(Oxidation)                                      | 1         | 3,27      | 3          | 1926,89096 | -0,34    | 642,96851  | 20,35    | 0                  |
|                  | High               | cGNmASILEVDDcR                      | Carbamidomethyl); M4(Oxidation); C13(Carbamidomet  | 1         | 3,22      | 2          | 1655,68266 | 0,22     | 828,34497  | 20,96    | 0                  |
|                  | High               | AKEILmDESNVQPVK                     | M6(Oxidation)                                      | 1         | 3,18      | 2          | 1716,88078 | -1,73    | 858,94403  | 18,90    | 1                  |
|                  | High               | NHTFIQFEPAPR                        |                                                    | 1         | 2,78      | 2          | 1456,73174 | -1,03    | 728,86951  | 20,98    | 0                  |
|                  | High               | EILmDESNVQPVK                       | M4(Oxidation)                                      | 1         | 2,56      | 2          | 1517,74986 | -1,19    | 759,37857  | 19,86    | 0                  |
|                  | High               | VVTIFSAFNYcYR                       | C11(Carbamidomethyl)                               | 1         | 2,47      | 2          | 1589,77725 | -0,54    | 795,39226  | 23,10    | 0                  |
| <b>AT5G26910</b> | <b>TRM8</b>        | <b>38,62</b>                        | <b>21,83</b>                                       | <b>11</b> | <b>11</b> | <b>852</b> |            |          |            |          |                    |
|                  | Peptide confidence | Sequence                            | Modifications                                      | Rank      | XCorr     | Charge     | MH+ [Da]   | ΔM [ppm] | m/z [Da]   | RT [min] | # Missed Cleavages |
|                  | High               | VLSESEVSdCtSFYDK                    | C11(Carbamidomethyl)                               | 1         | 4,33      | 2          | 1952,84294 | -0,05    | 976,92511  | 21,00    | 0                  |
|                  | High               | SDSSccASSVTSDDGQGTR                 | C5(Carbamidomethyl); C6(Carbamidomethyl)           | 1         | 4,28      | 2          | 1976,75078 | -2,50    | 988,87903  | 17,47    | 0                  |
|                  | High               | EYALGmATDVLPAFLFDEmEGR              | M6(Oxidation); M19(Oxidation)                      | 1         | 4,24      | 2          | 2447,10674 | -1,60    | 1224,05701 | 25,32    | 0                  |
|                  | High               | GLSSDSLSTQIGIGQDTPSAVSNIGDLSNALLEQK |                                                    | 1         | 4,21      | 3          | 3711,77817 | -1,39    | 1237,93091 | 25,68    | 0                  |
|                  | High               | LmGLESLPVNPVQePR                    | M2(Oxidation); E14(Methyl)                         | 1         | 3,76      | 2          | 1808,95256 | -2,78    | 904,97992  | 23,58    | 0                  |
|                  | High               | WDAYENLGYVNLr                       |                                                    | 1         | 3,69      | 2          | 1612,77402 | -0,91    | 806,89065  | 23,68    | 0                  |
|                  | High               | EmDVISFTFSSPIK                      | M2(Oxidation)                                      | 1         | 3,30      | 2          | 1616,78630 | -0,87    | 808,89679  | 24,57    | 0                  |
|                  | High               | EGVVSALVEPHLLSAF                    |                                                    | 1         | 3,19      | 2          | 1667,89958 | -0,48    | 834,45343  | 26,25    | 0                  |
|                  | High               | FQSETFPPR                           |                                                    | 1         | 2,60      | 2          | 1108,54094 | -1,16    | 554,77411  | 21,18    | 0                  |
|                  | High               | NPIYVmEAASR                         | M6(Oxidation)                                      | 1         | 2,56      | 2          | 1266,61394 | -0,65    | 633,81061  | 19,46    | 0                  |
|                  | High               | ITTLTTPSTSK                         |                                                    | 1         | 2,44      | 2          | 1236,66716 | -0,85    | 618,83722  | 19,02    | 0                  |
| <b>AT4G28760</b> | <b>TRM20</b>       | <b>35,29</b>                        | <b>13,53</b>                                       | <b>9</b>  | <b>9</b>  | <b>924</b> |            |          |            |          |                    |
|                  | Peptide confidence | Sequence                            | Modifications                                      | Rank      | XCorr     | Charge     | MH+ [Da]   | ΔM [ppm] | m/z [Da]   | RT [min] | # Missed Cleavages |
|                  | High               | LLQELVEEAVIDLTR                     |                                                    | 1         | 4,99      | 2          | 1740,97331 | -0,56    | 870,99030  | 29,93    | 0                  |
|                  | High               | DSGEDmDANSLAAELSVK                  | M6(Oxidation)                                      | 1         | 4,96      | 2          | 1867,82109 | -0,85    | 934,41418  | 21,79    | 0                  |
|                  | High               | DASQcSsmSQLAAPSPVTLTGK              | C5(Carbamidomethyl); M8(Oxidation)                 | 1         | 3,87      | 2          | 2252,05107 | -1,05    | 1126,52917 | 21,46    | 0                  |
|                  | High               | INSIVSETITTR                        |                                                    | 1         | 3,85      | 2          | 1321,69499 | -0,63    | 661,35114  | 19,64    | 0                  |
|                  | High               | TSSTLGEMLALTETK                     | M8(Oxidation)                                      | 1         | 3,69      | 2          | 1597,79778 | -0,77    | 799,40253  | 21,60    | 0                  |
|                  | High               | AVSSSQSSPR                          |                                                    | 1         | 3,06      | 2          | 1005,49584 | -0,16    | 503,25156  | 15,45    | 0                  |
|                  | High               | VSNLFFFK                            |                                                    | 1         | 2,70      | 2          | 1001,54588 | 0,36     | 501,27658  | 24,50    | 0                  |
|                  | High               | LASSSQETGWGNR                       |                                                    | 1         | 2,61      | 2          | 1392,64812 | -1,56    | 696,82770  | 18,83    | 0                  |
|                  | High               | GYFDEPEDVETK                        |                                                    | 1         | 2,52      | 2          | 1428,61565 | -0,66    | 714,81146  | 21,22    | 0                  |
| <b>AT2G42500</b> | <b>PP2A-3</b>      | <b>28,75</b>                        | <b>36,74</b>                                       | <b>1</b>  | <b>8</b>  | <b>313</b> |            |          |            |          |                    |
|                  | Peptide confidence | Sequence                            | Modifications                                      | Rank      | XCorr     | Charge     | MH+ [Da]   | ΔM [ppm] | m/z [Da]   | RT [min] | # Missed Cleavages |
|                  | High               | GAGYTFGQDISEQFNHTNNLK               |                                                    | 1         | 4,78      | 2          | 2341,08    | -0,80    | 1171,04    | 22,30    | 0                  |
|                  | High               | SPVTIcGDIHGQFHDLAELFR               | C6(Carbamidomethyl)                                | 1         | 3,71      | 3          | 2412,17    | -0,80    | 804,73     | 24,54    | 0                  |
|                  | High               | cGNmASILEVDDcR                      | Carbamidomethyl); M4(Oxidation); C13(Carbamidomet  | 1         | 3,22      | 2          | 1655,68    | 0,22     | 828,34     | 20,96    | 0                  |
|                  | High               | AKEILmDESNVQPVK                     | M6(Oxidation)                                      | 1         | 3,18      | 2          | 1716,88    | -1,73    | 858,94     | 18,90    | 1                  |
|                  | High               | IGGmcPDTNYLFmGDYVDR                 | M4(Oxidation); C5(Carbamidomethyl); M13(Oxidation) | 1         | 2,92      | 2          | 2255,94    | -0,86    | 1128,47    | 23,08    | 0                  |
|                  | High               | NHTFIQFEPAPR                        |                                                    | 1         | 2,78      | 2          | 1456,73    | -1,03    | 728,87     | 20,98    | 0                  |
|                  | High               | EILmDESNVQPVK                       | M4(Oxidation)                                      | 1         | 2,56      | 2          | 1517,75    | -1,19    | 759,38     | 19,86    | 0                  |
|                  | High               | VVTIFSAFNYcYR                       | C11(Carbamidomethyl)                               | 1         | 2,47      | 2          | 1589,78    | -0,54    | 795,39     | 23,10    | 0                  |
| <b>AT3G05750</b> | <b>TRM6</b>        | <b>25,87</b>                        | <b>13,23</b>                                       | <b>7</b>  | <b>7</b>  | <b>801</b> |            |          |            |          |                    |
|                  | Peptide confidence | Sequence                            | Modifications                                      | Rank      | XCorr     | Charge     | MH+ [Da]   | ΔM [ppm] | m/z [Da]   | RT [min] | # Missed Cleavages |
|                  | High               | SDSScSTSTPTSDDGQGSK                 | C5(Carbamidomethyl)                                | 1         | 4,16      | 2          | 1903,74394 | -1,00    | 952,37561  | 16,26    | 0                  |
|                  | High               | LmGLESLPVNPALEPR                    | M2(Oxidation)                                      | 1         | 3,82      | 2          | 1751,93328 | -1,63    | 876,47028  | 23,88    | 0                  |
|                  | High               | QNQFAETSVSNQR                       |                                                    | 1         | 3,31      | 2          | 1508,70842 | -0,29    | 754,85785  | 18,55    | 0                  |
|                  | High               | dmDVISFTFSSPIK                      | D1(Methyl); M2(Oxidation)                          | 2         | 3,30      | 2          | 1616,78630 | -0,87    | 808,89679  | 24,57    | 0                  |
|                  | High               | DmDVISFTFSSPIK                      | M2(Oxidation)                                      | 3         | 3,12      | 2          | 1602,77104 | -0,64    | 801,88916  | 25,04    | 0                  |
|                  | High               | SKKPANGVQEAAGVNSDK                  |                                                    | 1         | 2,98      | 3          | 1728,88565 | -1,12    | 576,96674  | 15,81    | 1                  |

|                  |                                   |                        |                      |          |          |             |            |          |            |          |                    |
|------------------|-----------------------------------|------------------------|----------------------|----------|----------|-------------|------------|----------|------------|----------|--------------------|
|                  | High                              | GQSPQISNGTcNNK         | C11(Carbamidomethyl) | 1        | 2,63     | 2           | 1504,68108 | 0,09     | 752,84418  | 16,73    | 0                  |
|                  | High                              | FSSSDSSSLPmK           | M12(Oxidation)       | 1        | 2,55     | 2           | 1375,60356 | -0,79    | 688,30542  | 18,19    | 0                  |
| <b>AT1G74160</b> | <b>TRM4</b>                       | <b>23,22</b>           | <b>9,37</b>          | <b>7</b> | <b>7</b> | <b>1025</b> |            |          |            |          |                    |
|                  | Peptide confidence                | Sequence               | Modifications        | Rank     | XCorr    | Charge      | MH+ [Da]   | ΔM [ppm] | m/z [Da]   | RT [min] | # Missed Cleavages |
|                  | High                              | SLQQVDDQLSQASNESR      |                      | 1        | 4,73     | 2           | 1904,89250 | -1,05    | 952,94989  | 20,71    | 0                  |
|                  | High                              | SGNWADFSGEmSGLVLDVER   | M11(Oxidation)       | 1        | 3,99     | 2           | 2184,98296 | -1,73    | 1092,99512 | 24,41    | 0                  |
|                  | High                              | YISEILLASGLLLR         |                      | 1        | 3,44     | 2           | 1560,93437 | -1,06    | 780,97083  | 27,60    | 0                  |
|                  | High                              | LSEFSFEScSSSK          | C9(Carbamidomethyl)  | 1        | 3,29     | 2           | 1521,63555 | -1,22    | 761,32141  | 18,69    | 0                  |
|                  | High                              | ELcSAIETQQK            | C3(Carbamidomethyl)  | 1        | 2,85     | 2           | 1306,62993 | -0,66    | 653,81860  | 19,09    | 0                  |
|                  | High                              | SPSVIEAAK              |                      | 1        | 2,54     | 2           | 901,49932  | 0,38     | 451,25330  | 18,43    | 0                  |
|                  | High                              | QQQSTNFAVQR            |                      | 1        | 2,38     | 2           | 1306,64934 | -0,41    | 653,82831  | 18,56    | 0                  |
| <b>AT1G25490</b> | <b>PP2AA1</b>                     | <b>17,70</b>           | <b>13,10</b>         | <b>1</b> | <b>5</b> | <b>588</b>  |            |          |            |          |                    |
|                  | Peptide confidence                | Sequence               | Modifications        | Rank     | XCorr    | Charge      | MH+ [Da]   | ΔM [ppm] | m/z [Da]   | RT [min] | # Missed Cleavages |
|                  | High                              | LLNPelaiQHILPcVK       | C14(Carbamidomethyl) | 1        | 3,78     | 2           | 1858,06035 | -0,88    | 929,53381  | 24,89    | 0                  |
|                  | High                              | LAIIEYVPLLASQLGIGFFDdK | D21(Methyl)          | 4        | 2,94     | 3           | 2436,33982 | -1,14    | 812,78479  | 31,43    | 0                  |
|                  | High                              | LLRDNEAEVR             |                      | 1        | 2,93     | 2           | 1214,64739 | -1,20    | 607,82733  | 17,65    | 1                  |
|                  | High                              | ELSSDSSQHVR            |                      | 1        | 2,59     | 2           | 1244,58501 | -1,29    | 622,79614  | 16,21    | 0                  |
|                  | High                              | YFANQALNSIDGSTAAQS     |                      | 1        | 2,54     | 2           | 1857,86443 | 1,62     | 929,43585  | 23,14    | 0                  |
| <b>AT5G57580</b> | <b>Calmodulin-binding protein</b> | <b>11,50</b>           | <b>6,96</b>          | <b>3</b> | <b>3</b> | <b>647</b>  |            |          |            |          |                    |
|                  | Peptide confidence                | Sequence               | Modifications        | Rank     | XCorr    | Charge      | MH+ [Da]   | ΔM [ppm] | m/z [Da]   | RT [min] | # Missed Cleavages |
|                  | High                              | EGVGTGLGELVFTDNSSWIR   |                      | 1        | 4,41     | 2           | 2080,03520 | 0,26     | 1040,52124 | 26,17    | 0                  |
|                  | High                              | LTAEGINTVEDFLR         |                      | 1        | 3,87     | 2           | 1577,81584 | -0,76    | 789,41156  | 24,82    | 0                  |
|                  | High                              | NLDGNDDQPER            |                      | 1        | 3,22     | 2           | 1387,57158 | -0,38    | 694,28943  | 17,51    | 0                  |
| <b>AT1G63670</b> | <b>TRM12</b>                      | <b>5,77</b>            | <b>3,92</b>          | <b>2</b> | <b>2</b> | <b>689</b>  |            |          |            |          |                    |
|                  | Peptide confidence                | Sequence               | Modifications        | Rank     | XCorr    | Charge      | MH+ [Da]   | ΔM [ppm] | m/z [Da]   | RT [min] | # Missed Cleavages |
|                  | High                              | IGLSFDDPNIDLIEK        |                      | 1        | 2,91     | 2           | 1688,87175 | -1,47    | 844,93951  | 24,77    | 0                  |
|                  | High                              | TSDVSTSTVGHR           |                      | 1        | 2,85     | 2           | 1246,60198 | -0,23    | 623,80463  | 16,47    | 0                  |

Protein identification details were obtained with the LTQ Orbitrap Velos (Thermo Fisher Scientific) and the Proteome Discoverer software package version 1.3 (Thermo Fisher Scientific) combined with search engine SEQUEST.

Proteins and peptides headers generated by the software package and used in the table are listed below.

**Score:** Displays the protein score, which is the sum of the scores of the individual peptides. For SEQUEST results, the score is the sum of all peptide Xcorr values above the specified score threshold. The score threshold is calculated as follows:  $0.8 + \text{peptide\_charge} \times \text{peptide\_relevance\_factor}$  where peptide\_relevance\_factor is an advanced parameter of the SEQUEST node in the "Protein Scoring Option" category with a default value of 0.4. For each spectrum, only the highest-scoring match is used. For each spectrum and sequence, the Proteome Discoverer application uses only the highest scored peptide. When it performs a search using dynamic modifications, one spectrum might have multiple matches because of permutations of the modification site. **Coverage:** Displays by default the percentage of the protein sequence covered by identified peptides. **# Unique Peptides:** Displays the number of peptide sequences unique to a protein group. **# Peptides:** Displays the number of distinct peptide sequences in the protein group. **# AAs:** Shows by default the sequence length of the protein. **Peptide Confidence:** Indicates a confidence level associated with the peptide sequence: high confidence (>99%), medium confidence (>95%, <99%), low confidence (<95%). **Sequence:** Displays the sequence of amino acids that compose the peptide. **Modifications:** Displays the static and dynamic modifications identified in the peptide. **XCorr (search-dependent):** Scores the number of fragment ions that are common to two different peptides with the same precursor mass and calculates the cross-correlation score for all candidate peptides queried from the database (SEQUEST searches only). **Rank:** Displays the ordering of peptides by rank. **# Missed Cleavages:** Displays the number of cleavage sites in a peptide sequence that a cleavage reagent (enzyme) did not cleave. This number excludes cases where an amino acid such as proline inhibits the cleaving enzyme. For example, if proline resides next to lysine or arginine, trypsin does not cleave the lysine or arginine. The # of Missed Cleavages value is 0 for a complete digest of all peptides. **Charge:** Displays the charge state of the peptide. **m/z [Da]:** Displays the mass-to-charge ratio of the precursor ion, in daltons. **MH+ [Da]:** Displays the protonated monoisotopic mass of the peptides, in daltons.  **$\Delta M$  [ppm]:** Displays the difference between the theoretical mass of the peptide and the experimental mass of the precursor ion. **RT [min]:** Displays the retention time when the peptide was observed, in minutes.

### Supplementary Table S3: VELOS orbitrap analysis of TAP TON1a and FASS eluates

| Bait  | Accession          | Description                    | Score                                                    | Coverage % | Unique Peptide # | Peptides # | AAs    |          |          |         |          |                    |
|-------|--------------------|--------------------------------|----------------------------------------------------------|------------|------------------|------------|--------|----------|----------|---------|----------|--------------------|
| TON1A | AT3G55000          | TON1a                          | 13660                                                    | 67.7       | 19               | 21         | 260    |          |          |         |          |                    |
| TON1A | Peptide confidence | Sequence                       | Modifications                                            | Rank       | Peptide score    | Expect     | Charge | Mr(Exp)  | Mr(Calc) | ΔM [Da] | m/z [Da] | # Missed Cleavages |
| TON1A | High               | NGDSGPLLLDVLGFLK               |                                                          | 1          | 139.44           | 5.60E-13   | 2      | 1785,951 | 1785,951 | 1E-04   | 893,983  | 0                  |
| TON1A | High               | VIENNEGPPALLGSCNDR             | E3(Methyl); C16(Carbamidomethyl)                         | 1          | 128.48           | 8.30E-12   | 2      | 2064,988 | 2064,99  | -0.002  | 1033,501 | 0                  |
| TON1A | High               | FESMTQMGSSSR                   |                                                          | 1          | 115.98           | 2.00E-11   | 2      | 1403,579 | 1403,581 | -0.002  | 702,797  | 0                  |
| TON1A | High               | RDSETESSSLESR                  | E4(Methyl)                                               | 1          | 114.44           | 1.20E-10   | 2      | 1582,705 | 1582,707 | -0.002  | 792,36   | 1                  |
| TON1A | High               | ASAALENQLDR                    |                                                          | 1          | 103.4            | 2.30E-09   | 2      | 1299,678 | 1299,678 | -2E-04  | 650,8463 | 0                  |
| TON1A | High               | ASVFEAIEEEDR                   | E9(Methyl)                                               | 1          | 100.06           | 4.80E-09   | 2      | 1407,651 | 1407,652 | -6E-04  | 704,8329 | 0                  |
| TON1A | High               | ASAALENQLDRK                   |                                                          | 1          | 95.28            | 1.20E-08   | 2      | 1427,772 | 1427,773 | -0.001  | 714,8933 | 1                  |
| TON1A | High               | DSETESSSLESR                   |                                                          | 1          | 94.03            | 5.50E-09   | 2      | 1412,591 | 1412,59  | 3E-04   | 707,3026 | 0                  |
| TON1A | High               | ASVFEAIEEEDRVIENNEGPPALLGSCNDR | C28(Carbamidomethyl)                                     | 1          | 92.36            | 2.00E-08   | 3      | 3426,594 | 3426,6   | -0.006  | 1143,205 | 1                  |
| TON1A | High               | SSASDSLPPQR                    |                                                          | 1          | 86.84            | 7.40E-08   | 2      | 1143,552 | 1143,552 | -2E-04  | 572,7832 | 0                  |
| TON1A | High               | DFNSNNGFELNR                   |                                                          | 1          | 78.36            | 3.50E-07   | 2      | 1425,622 | 1425,627 | -0.005  | 713,8183 | 0                  |
| TON1A | High               | AGLSTSGYR                      |                                                          | 1          | 76.86            | 8.20E-07   | 2      | 910,4507 | 910,4508 | -2E-04  | 456,2326 | 0                  |
| TON1A | High               | QGNQDTHIEVTR                   | E8(Methyl)                                               | 1          | 73.14            | 1.60E-06   | 2      | 1426,641 | 1426,644 | -0.003  | 714,3278 | 0                  |
| TON1A | High               | RPVSAQSADR                     |                                                          | 1          | 71.07            | 4.20E-06   | 2      | 1172,586 | 1172,59  | -0.003  | 587,3005 | 1                  |
| TON1A | High               | RSSASDSLPPQR                   |                                                          | 1          | 55.55            | 1.30E-04   | 2      | 1299,652 | 1299,653 | -0.001  | 650,8332 | 1                  |
| TON1A | High               | DFNSNNGFELNRNGDSGPLLLDVLGFLK   |                                                          | 1          | 53.23            | 2.20E-04   | 3      | 3194,542 | 3193,568 | 0.974   | 1065,855 | 1                  |
| TON1A | High               | KLHASPGR                       |                                                          | 1          | 51.22            | 2.00E-04   | 2      | 951,5245 | 951,525  | -5E-04  | 476,7695 | 1                  |
| TON1A | High               | RAGLSTSGYR                     |                                                          | 1          | 50.03            | 4.90E-04   | 2      | 1066,551 | 1066,552 | -6E-04  | 534,283  | 1                  |
| TON1A | High               | KDEFNWR                        |                                                          | 1          | 48.19            | 7.20E-04   | 2      | 993,4675 | 993,4668 | 7E-04   | 497,741  | 1                  |
| TON1A | High               | DGTNEEGR                       |                                                          | 1          | 40.85            | 2.70E-04   | 2      | 1005,4   | 1005,4   | 4E-04   | 503,7074 | 0                  |
| TON1A | High               | EMMDLK                         | M2(Oxidation)                                            | 1          | 34.9             | 5.30E-03   | 2      | 781,3349 | 781,335  | -1E-04  | 391,6747 | 0                  |
| TON1A | Accession          | Description                    | Score                                                    | Coverage % | Unique Peptide # | Peptides # | AAs    |          |          |         |          |                    |
| TON1A | AT3G55005          | TON1b                          | 3596                                                     | 62.3       | 11               | 13         | 257    |          |          |         |          |                    |
| TON1A | Peptide confidence | Sequence                       | Modifications                                            | Rank       | Peptide score    | Expect     | Charge | Mr(Exp)  | Mr(Calc) | ΔM [Da] | m/z [Da] | # Missed Cleavages |
| TON1A | High               | SVSASQASGAATSGYR               |                                                          | 1          | 137.32           | 7.30E-13   | 2      | 1498,695 | 1498,701 | -0.006  | 750,3547 | 0                  |
| TON1A | High               | PLDLLDVLGFLK                   |                                                          | 1          | 109.56           | 1.10E-10   | 2      | 1355,806 | 1355,806 | -4E-04  | 678,9103 | 0                  |
| TON1A | High               | FENMTQVMGSSSR                  |                                                          | 1          | 105.35           | 5.60E-10   | 2      | 1442,627 | 1442,628 | -0.002  | 722,3206 | 0                  |
| TON1A | High               | VIENNEGPPALLGSCNDR             | C16(Carbamidomethyl)                                     | 1          | 105.33           | 1.80E-09   | 2      | 2067,005 | 2067,006 | -2E-04  | 1034,51  | 0                  |
| TON1A | High               | ASVFEAIEEEDR                   | M9(Methyl)                                               | 1          | 100.06           | 4.80E-09   | 2      | 1407,651 | 1407,652 | -6E-04  | 704,8329 | 0                  |
| TON1A | High               | SSASDSLPHQR                    |                                                          | 1          | 90.07            | 3.50E-08   | 2      | 1183,558 | 1183,558 | -2E-04  | 592,7862 | 0                  |
| TON1A | High               | NEDSRPLDLLDVLGFLK              |                                                          | 1          | 88.36            | 4.30E-08   | 3      | 1957,052 | 1957,052 | -5E-04  | 653,3578 | 1                  |
| TON1A | High               | ASTALENQLDR                    |                                                          | 1          | 87.7             | 1.00E-07   | 2      | 1329,689 | 1329,689 | 1E-04   | 665,8517 | 0                  |
| TON1A | High               | YDTEDEPEEVMR                   |                                                          | 1          | 74.45            | 1.70E-07   | 2      | 1513,805 | 1513,807 | -0.002  | 757,8096 | 0                  |
| TON1A | High               | DFNSNNGFELNR                   |                                                          | 1          | 70.46            | 5.20E-06   | 2      | 1440,65  | 1440,663 | -0.014  | 721,3321 | 0                  |
| TON1A | High               | LLSALICEVLDWAQLNHTLK           | C7(Carbamidomethyl)                                      | 1          | 57.52            | 7.20E-05   | 3      | 2400,252 | 2400,251 | 4E-04   | 801,0911 | 0                  |
| TON1A | High               | VYQPECNASAK                    | C8(Carbamidomethyl)                                      | 1          | 56.03            | 7.80E-05   | 2      | 1194,533 | 1194,534 | -8E-04  | 598,2738 | 0                  |
| TON1A | High               | EMMDLK                         | M2(Oxidation)                                            | 1          | 34.9             | 5.30E-03   | 2      | 781,3349 | 781,335  | -1E-04  | 391,6747 | 0                  |
| TON1A | Accession          | Description                    | Score                                                    | Coverage % | Unique Peptide # | Peptides # | AAs    |          |          |         |          |                    |
| TON1A | AT5G18580          | FASS                           | 1323                                                     | 51.5       | 20               | 20         | 480    |          |          |         |          |                    |
| TON1A | Peptide confidence | Sequence                       | Modifications                                            | Rank       | Peptide score    | Expect     | Charge | Mr(Exp)  | Mr(Calc) | ΔM [Da] | m/z [Da] | # Missed Cleavages |
| TON1A | High               | YIGSGAGLGSEALMELETK            |                                                          | 1          | 144.7            | 2.10E-13   | 2      | 1924,943 | 1924,945 | -0.002  | 963,479  | 0                  |
| TON1A | High               | QSDLLLNADDLAAMWVCLR            | M14(Oxidation); C17(Carbamidomethyl)                     | 1          | 131.18           | 4.50E-12   | 2      | 2219,071 | 2219,072 | 0       | 1110,543 | 0                  |
| TON1A | High               | EMDFDSFLDFLVALENK              | M2(Oxidation)                                            | 1          | 115.01           | 1.40E-10   | 2      | 2047,946 | 2047,945 | 0.002   | 1024,981 | 0                  |
| TON1A | High               | ENLLQEEEPPEESQ                 |                                                          | 1          | 108.71           | 1.80E-10   | 2      | 1927,815 | 1927,817 | -0.002  | 964,9149 | 0                  |
| TON1A | High               | EYADGTLTEIFIR                  |                                                          | 1          | 105.95           | 1.30E-09   | 2      | 1655,806 | 1655,804 | 0.001   | 828,91   | 0                  |
| TON1A | High               | GGGTVASMLDVR                   |                                                          | 1          | 103.75           | 2.90E-09   | 2      | 1345,702 | 1345,702 | -9E-04  | 673,858  | 0                  |
| TON1A | High               | SQEAGTIPSFYK                   |                                                          | 1          | 94.53            | 1.60E-08   | 2      | 1326,646 | 1326,646 | -1E-04  | 664,33   | 0                  |
| TON1A | High               | GFLTADHSLFR                    |                                                          | 1          | 88.06            | 1.00E-07   | 2      | 1476,772 | 1476,773 | -5E-04  | 739,3933 | 0                  |
| TON1A | High               | MNYEDFCHIASVCTEQIGPK           | M1(Oxidation); C7(Carbamidomethyl); C13(Carbamidomethyl) | 1          | 84.05            | 5.10E-08   | 3      | 2414,032 | 2414,034 | -0.003  | 805,6845 | 0                  |
| TON1A | High               | DTPEGLTYLFR                    |                                                          | 1          | 80.13            | 5.10E-07   | 2      | 1310,651 | 1310,651 | 1E-04   | 656,3326 | 0                  |
| TON1A | High               | ITLDGDLGCK                     | C9(Carbamidomethyl)                                      | 1          | 73.21            | 3.20E-06   | 2      | 1088,59  | 1088,59  | 2E-04   | 545,3024 | 0                  |
| TON1A | High               | ICDMFLALDK                     | C2(Carbamidomethyl)                                      | 1          | 71.4             | 3.80E-06   | 2      | 1224,589 | 1224,588 | 6E-04   | 613,3017 | 0                  |
| TON1A | High               | ENCVIDDATGAEK                  | C3(Carbamidomethyl)                                      | 1          | 70.28            | 1.70E-06   | 2      | 1420,61  | 1420,614 | -0.004  | 711,3122 | 0                  |
| TON1A | High               | DMPPAFNQMYCR                   | M2(Oxidation); C11(Carbamidomethyl)                      | 1          | 54.97            | 1.40E-05   | 2      | 1544,62  | 1544,621 | -0.001  | 773,3171 | 0                  |
| TON1A | High               | ILLEIFK                        |                                                          | 1          | 53.31            | 1.40E-05   | 2      | 874,5528 | 874,5528 | 1E-04   | 438,2837 | 0                  |
| TON1A | High               | FFFFCDPHR                      | C5(Carbamidomethyl)                                      | 1          | 44.26            | 7.60E-04   | 2      | 1271,554 | 1271,555 | -7E-04  | 636,7843 | 0                  |
| TON1A | High               | CLDLQGR                        | C1(Carbamidomethyl)                                      | 1          | 43.46            | 2.50E-03   | 2      | 860,4177 | 860,4174 | 3E-04   | 431,2161 | 0                  |
| TON1A | High               | VFDEHVR                        |                                                          | 1          | 41.56            | 2.00E-03   | 2      | 900,4455 | 900,4454 | 2E-04   | 451,23   | 0                  |
| TON1A | High               | GFWAHDNR                       |                                                          | 1          | 39.82            | 1.50E-03   | 2      | 1001,446 | 1001,447 | -5E-04  | 501,7304 | 0                  |
| TON1A | High               | KPEEGSISQR                     |                                                          | 1          | 37.23            | 8.80E-03   | 2      | 1129,572 | 1129,573 | -9E-04  | 565,7932 | 1                  |
| TON1A | Accession          | Description                    | Score                                                    | Coverage % | Unique Peptide # | Peptides # | AAs    |          |          |         |          |                    |
| TON1A | AT3G25800          | PP2AA2                         | 475                                                      | 29         | 8                | 11         | 587    |          |          |         |          |                    |
| TON1A | Peptide confidence | Sequence                       | Modifications                                            | Rank       | Peptide score    | Expect     | Charge | Mr(Exp)  | Mr(Calc) | ΔM [Da] | m/z [Da] | # Missed Cleavages |
| TON1A | High               | TDVMSMFEDLTQDDQDSVR            |                                                          | 1          | 139.42           | 1.10E-13   | 2      | 2230,937 | 2230,936 | 0.001   | 1116,476 | 0                  |
| TON1A | High               | ESLDVDFHSLVK                   |                                                          | 1          | 85.81            | 1.50E-07   | 2      | 1500,782 | 1500,782 | -5E-04  | 751,3982 | 0                  |
| TON1A | High               | SALASVIMGMAPVLGK               |                                                          | 1          | 77.81            | 6.90E-07   | 2      | 1543,846 | 1543,847 | -3E-04  | 772,9304 | 0                  |
| TON1A | High               | FFANQALQSIDNMMSS               | M15(Oxidation)                                           | 1          | 71.83            | 1.80E-06   | 2      | 1917,86  | 1917,86  | -1E-04  | 959,9373 | 0                  |
| TON1A | High               | LAAGEWFTAR                     |                                                          | 1          | 67.55            | 1.20E-05   | 2      | 1120,56  | 1120,567 | -0.006  | 561,2874 | 0                  |
| TON1A | High               | TIRPGLVLESDPDVDVR              |                                                          | 1          | 58.51            | 6.40E-05   | 2      | 2009,042 | 2009,043 | -0.001  | 1005,528 | 1                  |
| TON1A | High               | ELSSDSSQHYR                    |                                                          | 1          | 56.62            | 6.90E-05   | 2      | 1243,579 | 1243,579 | -3E-04  | 622,7967 | 0                  |
| TON1A | High               | AVSLLAPVMGSEITCSK              | C15(Carbamidomethyl)                                     | 1          | 56.53            | 1.50E-04   | 2      | 1761,901 | 1761,901 | 1E-04   | 881,9576 | 0                  |
| TON1A | High               | VLQSLIPVDQSVVEK                |                                                          | 1          | 56.33            | 2.00E-05   | 2      | 1766,018 | 1766,019 | -0.001  | 884,0162 | 0                  |
| TON1A | High               | LLEPQDCVQHILPVI/NFVSQDK        | C7(Carbamidomethyl)                                      | 1          | 52.79            | 2.10E-04   | 3      | 2591,34  | 2591,342 | -0.002  | 864,7874 | 0                  |
| TON1A | High               | FAATVESHLK                     |                                                          | 1          | 52.37            | 3.50E-04   | 2      | 1172,617 | 1172,619 | -0.002  | 587,316  | 0                  |

| Accession | Description        | Score                               | Coverage | % Unique      | Peptide # | Peptides | # AAs    |          |        |          |                    |
|-----------|--------------------|-------------------------------------|----------|---------------|-----------|----------|----------|----------|--------|----------|--------------------|
| TON1A     | AT5G57580          | 313                                 | 14,8     | 7             | 8         | 647      |          |          |        |          |                    |
| TON1A     | Peptide confidence | Modifications                       | Rank     | Peptide score | Expect    | Charge   | Mr(Exp)  | Mr(Calc) | Δ [Da] | m/z [Da] | # Missed Cleavages |
| TON1A     | High               | LTAEAGINTVEDFLR                     | 1        | 105,31        | 2,20E-09  | 2        | 1576,809 | 1576,81  | -3E-04 | 789,412  | 0                  |
| TON1A     | High               | EGVGTGLGVFTDNNSSWIR                 | 1        | 91,18         | 4,80E-08  | 2        | 2079,028 | 2079,027 | 4E-04  | 1040,521 | 0                  |
| TON1A     | High               | LYIYYAEDSR                          | 1        | 78,34         | 7,10E-07  | 2        | 1291,61  | 1291,608 | 0,002  | 646,8123 | 0                  |
| TON1A     | High               | MWDALVEHAK                          | 1        | 68,57         | 5,60E-06  | 2        | 1198,58  | 1198,581 | 0      | 600,2975 | 0                  |
| TON1A     | High               | LCSSELPILR                          | 1        | 59,75         | 6,50E-05  | 2        | 1186,038 | 1186,038 | -3E-04 | 594,3261 | 0                  |
| TON1A     | High               | AVVYGPASAK                          | 1        | 51,35         | 5,10E-04  | 2        | 1090,565 | 1090,566 | -8E-04 | 546,2898 | 0                  |
| TON1A     | High               | LSLPLFTGGK                          | 1        | 44,04         | 8,10E-04  | 2        | 1031,601 | 1031,602 | -1E-04 | 516,808  | 0                  |
| TON1A     | High               | HYPPALNDVVWR                        | 1        | 38,77         | 7,20E-03  | 2        | 1481,704 | 1481,705 | -0,001 | 741,8592 | 0                  |
| TON1A     | AT3G53540          | 307                                 | 11,8     | 9             | 9         | 924      |          |          |        |          |                    |
| TON1A     | Peptide confidence | Modifications                       | Rank     | Peptide score | Expect    | Charge   | Mr(Exp)  | Mr(Calc) | Δ [Da] | m/z [Da] | # Missed Cleavages |
| TON1A     | High               | SHSSYNSPEVSIPTLSLK                  | 1        | 141,16        | 4,30E-13  | 2        | 2005,959 | 2005,959 | 2E-04  | 1003,987 | 0                  |
| TON1A     | High               | ELQWLSLEDDIEIGR                     | 1        | 105,19        | 1,50E-09  | 2        | 1927,988 | 1927,989 | -0,001 | 965,0011 | 0                  |
| TON1A     | High               | LLFDQISR                            | 1        | 57,35         | 7,70E-05  | 2        | 990,5495 | 990,5498 | -3E-04 | 496,282  | 0                  |
| TON1A     | High               | EGDQPSPVSVLEASFDVSSGSECFESVSADLR    | 1        | 54,53         | 5,40E-05  | 3        | 3617,568 | 3616,564 | 1,005  | 1206,863 | 0                  |
| TON1A     | High               | MQLQLLK                             | 1        | 54,28         | 2,10E-04  | 2        | 872,5149 | 872,5153 | -4E-04 | 437,2647 | 0                  |
| TON1A     | High               | KLFDQISR                            | 1        | 47,98         | 3,90E-04  | 2        | 1118,644 | 1118,645 | -3E-04 | 560,3295 | 1                  |
| TON1A     | High               | LPCTTHIGR                           | 1        | 45,34         | 6,50E-04  | 2        | 1041,502 | 1041,503 | -6E-04 | 521,7583 | 0                  |
| TON1A     | High               | IQETLR                              | 1        | 39,35         | 7,20E-03  | 2        | 758,4288 | 758,4286 | 2E-04  | 380,2217 | 0                  |
| TON1A     | High               | FEHEISR                             | 1        | 36,28         | 9,20E-03  | 2        | 1158,567 | 1158,567 | -4E-04 | 580,2905 | 0                  |
| TON1A     | AT2G42500/AT3G5850 | 203                                 | 31       | 8             | 8         | 313      |          |          |        |          |                    |
| TON1A     | Peptide confidence | Modifications                       | Rank     | Peptide score | Expect    | Charge   | Mr(Exp)  | Mr(Calc) | Δ [Da] | m/z [Da] | # Missed Cleavages |
| TON1A     | High               | QITQVYGFYDECLR                      | 1        | 86,57         | 1,00E-07  | 2        | 1790,828 | 1790,83  | -0,002 | 896,4212 | 0                  |
| TON1A     | High               | NHTFIQFEPAPR                        | 1        | 64,52         | 1,80E-05  | 2        | 1455,726 | 1455,726 | -4E-04 | 728,87   | 0                  |
| TON1A     | High               | VVTIFSAPNYCYR                       | 1        | 63,31         | 2,60E-05  | 2        | 1588,77  | 1588,771 | -0,001 | 795,3921 | 0                  |
| TON1A     | High               | EILMDESINVQPVK                      | 1        | 47,99         | 9,40E-04  | 2        | 1516,744 | 1516,744 | -8E-04 | 759,379  | 0                  |
| TON1A     | High               | YGNANVWK                            | 1        | 45,9          | 1,40E-03  | 2        | 950,4602 | 950,461  | -8E-04 | 476,2374 | 0                  |
| TON1A     | High               | RGEPDVTR                            | 1        | 41,29         | 2,00E-03  | 2        | 928,4738 | 928,4726 | 0,001  | 465,2442 | 1                  |
| TON1A     | High               | GAGYTFGQDISEQFNHTNNLK               | 1        | 40,63         | 3,50E-03  | 3        | 2340,075 | 2340,077 | -0,002 | 781,0324 | 0                  |
| TON1A     | High               | PLSEQQVR                            | 1        | 40,4          | 2,60E-03  | 2        | 955,5088 | 955,5087 | 1E-04  | 478,7617 | 0                  |
| TON1A     | AT3G05750          | 179                                 | 6,4      | 4             | 4         | 801      |          |          |        |          |                    |
| TON1A     | Peptide confidence | Modifications                       | Rank     | Peptide score | Expect    | Charge   | Mr(Exp)  | Mr(Calc) | Δ [Da] | m/z [Da] | # Missed Cleavages |
| TON1A     | High               | EFSLGMATDILPLSLFDETEGK              | 1        | 101,6         | 4,10E-09  | 2        | 2412,175 | 2412,177 | -0,002 | 1207,095 | 0                  |
| TON1A     | High               | QNQFAETSVSNQR                       | 1        | 83,53         | 2,10E-07  | 2        | 1507,7   | 1507,702 | -0,002 | 754,8571 | 0                  |
| TON1A     | High               | QDIFLER                             | 1        | 66,95         | 1,60E-05  | 2        | 919,4759 | 919,4763 | -4E-04 | 460,7452 | 0                  |
| TON1A     | High               | EILADQVLK                           | 1        | 36,03         | 6,30E-03  | 2        | 1027,591 | 1027,591 | -5E-04 | 514,8027 | 0                  |
| TON1A     | AT5G26910          | 86                                  | 4,6      | 2             | 2         | 853      |          |          |        |          |                    |
| TON1A     | Peptide confidence | Modifications                       | Rank     | Peptide score | Expect    | Charge   | Mr(Exp)  | Mr(Calc) | Δ [Da] | m/z [Da] | # Missed Cleavages |
| TON1A     | High               | ETYEEGIDIEGEIVSTLVDLVDLVSGTQR       | 1        | 78,91         | 5,00E-07  | 3        | 3407,643 | 3407,647 | -0,003 | 1136,888 | 0                  |
| TON1A     | High               | TLDFVFNK                            | 1        | 37,73         | 5,20E-03  | 2        | 982,5128 | 982,5124 | 4E-04  | 492,2637 | 0                  |
| TON1A     | AT2G45240          | 50                                  | 5,3      | 2             | 2         | 398      |          |          |        |          |                    |
| TON1A     | Peptide confidence | Modifications                       | Rank     | Peptide score | Expect    | Charge   | Mr(Exp)  | Mr(Calc) | Δ [Da] | m/z [Da] | # Missed Cleavages |
| TON1A     | High               | HATMSGLSVVR                         | 1        | 41,17         | 4,30E-03  | 2        | 1172,595 | 1172,597 | -0,002 | 587,3049 | 0                  |
| TON1A     | High               | AIAIVKPGVR                          | 1        | 35,45         | 4,00E-04  | 2        | 1022,66  | 1022,66  | -2E-04 | 512,3372 | 1                  |
| Bait      | AT5G18580          | 3906                                | 81       | 32            | 32        | 480      |          |          |        |          |                    |
| FASS      | Peptide confidence | Modifications                       | Rank     | Peptide score | Expect    | Charge   | Mr(Exp)  | Mr(Calc) | Δ [Da] | m/z [Da] | # Missed Cleavages |
| FASS      | High               | YIGSGAGLGSSEALMELETK                | 1        | 157,28        | 1,20E-14  | 2        | 1924,945 | 1924,945 | 2E-04  | 963,48   | 0                  |
| FASS      | High               | QSDLLLNADDLAAMWVCLR                 | 1        | 146,63        | 1,40E-13  | 2        | 2203,08  | 2203,077 | 0,004  | 1102,547 | 0                  |
| FASS      | High               | MNYEDFCHIASVCTEQIGPK                | 1        | 130,67        | 1,10E-12  | 2        | 2414,032 | 2414,034 | -0,002 | 1208,023 | 0                  |
| FASS      | High               | EMDFDSFLDFVLALENK                   | 1        | 123           | 2,60E-11  | 2        | 2031,951 | 2031,95  | 7E-04  | 1016,983 | 0                  |
| FASS      | High               | SQEAAGTIPSFYK                       | 1        | 114,05        | 1,90E-10  | 2        | 1326,645 | 1326,646 | -0,001 | 664,3296 | 0                  |
| FASS      | High               | QGGTVAKMLDVR                        | 1        | 107,68        | 1,20E-09  | 2        | 1345,702 | 1345,702 | -2E-04 | 673,8584 | 0                  |
| FASS      | High               | ICDMFLALDKDMSSGLCK                  | 1        | 107,63        | 4,80E-10  | 2        | 2118,946 | 2118,946 | 0      | 1060,48  | 1                  |
| FASS      | High               | GFLTADHSLFR                         | 1        | 100,06        | 6,00E-09  | 2        | 1476,772 | 1476,773 | -2E-04 | 739,3934 | 0                  |
| FASS      | High               | EYADGTLTEIFER                       | 1        | 99,64         | 5,70E-09  | 2        | 1655,804 | 1655,804 | -8E-04 | 828,909  | 0                  |
| FASS      | High               | ENCVIDDATGAEK                       | 1        | 89,89         | 2,50E-08  | 2        | 1434,629 | 1434,63  | -0,001 | 718,3215 | 0                  |
| FASS      | High               | WIEGGNYELCIEDVR                     | 1        | 87,5          | 7,90E-08  | 2        | 1865,861 | 1865,862 | -8E-04 | 933,9378 | 0                  |
| FASS      | High               | DTPEGLTYLFR                         | 1        | 84,2          | 2,00E-07  | 2        | 1324,669 | 1324,666 | 0,003  | 663,342  | 0                  |
| FASS      | High               | ITLGDLLGCK                          | 1        | 79,08         | 8,30E-07  | 2        | 1088,59  | 1088,59  | -2E-04 | 545,3022 | 0                  |
| FASS      | High               | WIEGGNYELCIEDVRDEIWDVMK             | 1        | 75,28         | 1,10E-06  | 3        | 2868,31  | 2868,31  | 4E-04  | 957,1107 | 1                  |
| FASS      | High               | .SNCLQELMELHQSEEEVTDTEQAENWFSLTSA   | 1        | 72,75         | 1,20E-06  | 3        | 4523,093 | 4523,074 | 0,019  | 1508,705 | 0                  |
| FASS      | High               | ICDMFLALDK                          | 1        | 71,65         | 3,60E-06  | 2        | 1224,588 | 1224,588 | -2E-04 | 613,3013 | 0                  |
| FASS      | High               | IPPASSMLWVR                         | 1        | 69,56         | 5,80E-06  | 2        | 1271,67  | 1271,67  | 1E-04  | 636,8421 | 0                  |
| FASS      | High               | KPEEGSISQSR                         | 1        | 67,63         | 8,40E-06  | 2        | 1129,573 | 1129,573 | 0      | 565,7936 | 1                  |
| FASS      | High               | IDMSELDESDGFLHSDDEMIESYIGGLIPNLAQLR | 1        | 67,21         | 4,60E-06  | 3        | 3824,738 | 3824,74  | -0,002 | 1275,92  | 0                  |
| FASS      | High               | IAILPFYLMVR                         | 1        | 59,31         | 4,00E-05  | 2        | 1513,836 | 1513,837 | -5E-04 | 757,9254 | 0                  |
| FASS      | High               | DEIWDVMKPSDPLK                      | 1        | 55,9          | 1,40E-04  | 2        | 1671,818 | 1671,818 | -2E-04 | 836,9161 | 1                  |
| FASS      | High               | FFFCDPHR                            | 1        | 52,39         | 1,20E-04  | 2        | 1271,554 | 1271,555 | -4E-04 | 636,7844 | 0                  |
| FASS      | High               | VFDEHVR                             | 1        | 52,06         | 1,80E-04  | 2        | 900,4445 | 900,4454 | -8E-04 | 451,2295 | 0                  |
| FASS      | High               | ILLEIFK                             | 1        | 50,34         | 2,90E-05  | 2        | 874,5529 | 874,5528 | 2E-04  | 438,2837 | 0                  |
| FASS      | High               | DMPAPFNQMYCR                        | 1        | 48,04         | 1,10E-04  | 2        | 1528,626 | 1528,626 | -3E-04 | 765,3202 | 0                  |
| FASS      | High               | FFSPSNFMK                           | 1        | 44,83         | 1,10E-03  | 2        | 1103,511 | 1103,511 | 1E-04  | 552,7628 | 0                  |

|      |                    |                                |                                                     |          |               |          |           |          |          |         |          |                    |
|------|--------------------|--------------------------------|-----------------------------------------------------|----------|---------------|----------|-----------|----------|----------|---------|----------|--------------------|
| FASS | High               | GFWAHDNR                       |                                                     | 1        | 44.77         | 5.00E-04 | 2         | 1001.447 | 1001.447 | 1E-04   | 501.7307 | 0                  |
| FASS | High               | TVLSLQAR                       |                                                     | 1        | 44.65         | 2.70E-03 | 2         | 874.4873 | 874.4872 | 0       | 438.2509 | 0                  |
| FASS | High               | KIPPASSMLWVR                   | M8(Oxidation)                                       | 1        | 44.64         | 1.50E-03 | 2         | 1399.764 | 1399.765 | -0.001  | 700.889  | 1                  |
| FASS | High               | CLDLQGR                        | C1(Carbamidomethyl)                                 | 1        | 43.5          | 2.50E-03 | 2         | 860.4179 | 860.4174 | 4E-04   | 431.2162 | 0                  |
| FASS | High               | DMSGSLCK                       | C7(Carbamidomethyl)                                 | 1        | 40.97         | 9.60E-04 | 2         | 896.3733 | 896.3732 | 1E-04   | 449.1939 | 0                  |
| FASS | High               | FEKDEAGR                       |                                                     | 1        | 40.95         | 3.80E-03 | 2         | 950.4455 | 950.4457 | -2E-04  | 476.2301 | 1                  |
| FASS | Accession          | Description                    | Score                                               | Coverage | %f            | Unique   | Peptide # | Peptides | #        | AAs     |          |                    |
| FASS | AT3G55000          | TON1A                          | 1540                                                | 60.8     | 15            | 16       | 260       |          |          |         |          |                    |
| FASS | Peptide confidence | Sequence                       | Modifications                                       | Rank     | Peptide score | Expect   | Charge    | Mr(Exp)  | Mr(Calc) | ΔM [Da] | m/z [Da] | # Missed Cleavages |
| FASS | High               | NGDSGPLLLDLVLEGLFK             |                                                     | 1        | 146.46        | 1.20E-13 | 2         | 1785.951 | 1785.951 | -1E-04  | 893.9828 | 0                  |
| FASS | High               | VIENNEGPPALLGSCNDR             | C16(Carbamidomethyl)                                | 1        | 112.98        | 2.90E-10 | 2         | 2050.971 | 2050.974 | -0.003  | 1026.493 | 0                  |
| FASS | High               | DSETSSSSLESR                   | E11(Methyl)                                         | 1        | 97.46         | 3.00E-09 | 2         | 1426.605 | 1426.606 | -9E-04  | 714.3098 | 0                  |
| FASS | High               | ASAALENLQDR                    |                                                     | 1        | 90.73         | 4.00E-08 | 2         | 1299.678 | 1299.678 | 1E-04   | 650.8464 | 0                  |
| FASS | High               | FESMTQGMGSSSR                  | M4(Oxidation)                                       | 1        | 87.95         | 1.00E-08 | 2         | 1419.575 | 1419.576 | -7E-04  | 710.7949 | 0                  |
| FASS | High               | ASVFEAIEEEDR                   |                                                     | 1        | 86.91         | 9.00E-08 | 2         | 1393.636 | 1393.636 | 0       | 697.8253 | 0                  |
| FASS | High               | RDSETSSSSLESR                  |                                                     | 1        | 75.52         | 7.30E-07 | 2         | 1568.691 | 1568.691 | -2E-04  | 785.3529 | 1                  |
| FASS | High               | DFNSNNGFELNRNGDSGPLLLDLVLEGLFK |                                                     | 1        | 74.46         | 1.70E-06 | 3         | 3194.544 | 3193.568 | 0.976   | 1065.855 | 1                  |
| FASS | High               | RPVSAQASDR                     |                                                     | 1        | 73.76         | 2.00E-06 | 2         | 1172.589 | 1172.59  | -4E-04  | 587.302  | 1                  |
| FASS | High               | DFNSNNGFELNR                   |                                                     | 1        | 72.79         | 1.30E-06 | 2         | 1425.625 | 1425.627 | -0.002  | 713.8198 | 0                  |
| FASS | High               | SSASDSLPPDR                    |                                                     | 1        | 64.13         | 1.40E-05 | 2         | 1143.553 | 1143.552 | 0.001   | 572.7838 | 0                  |
| FASS | High               | ASLSTSGYR                      |                                                     | 1        | 49.7          | 4.30E-04 | 2         | 910.4509 | 910.4508 | 1E-04   | 456.2327 | 0                  |
| FASS | High               | ASVFEAIEEEDRVIENNEGPPALLGSCNDR | C28(Carbamidomethyl)                                | 1        | 48.3          | 5.10E-04 | 3         | 3426.597 | 3426.6   | -0.003  | 1143.206 | 1                  |
| FASS | High               | QGNQDTHVEVTR                   | E8(Methyl)                                          | 1        | 46.2          | 8.30E-04 | 2         | 1426.644 | 1426.644 | -2E-04  | 714.329  | 0                  |
| FASS | High               | KDEFNWR                        |                                                     | 1        | 42.62         | 2.60E-03 | 2         | 993.4677 | 993.4668 | 9E-04   | 497.7411 | 1                  |
| FASS | High               | KLHASPSGR                      |                                                     | 1        | 35.75         | 7.20E-03 | 2         | 951.5244 | 951.525  | -6E-04  | 476.7895 | 1                  |
| FASS | Accession          | Description                    | Score                                               | Coverage | %f            | Unique   | Peptide # | Peptides | #        | AAs     |          |                    |
| FASS | AT3G55005          | TON1b                          | 1096                                                | 55.6     | 11            | 12       | 257       |          |          |         |          |                    |
| FASS | Peptide confidence | Sequence                       | Modifications                                       | Rank     | Peptide score | Expect   | Charge    | Mr(Exp)  | Mr(Calc) | ΔM [Da] | m/z [Da] | # Missed Cleavages |
| FASS | High               | SVSASQASGAATSGYR               |                                                     | 1        | 128.43        | 5.70E-12 | 2         | 1498.701 | 1498.701 | -7E-04  | 750.3575 | 0                  |
| FASS | High               | PLLLDLVLEGLFK                  |                                                     | 1        | 115.16        | 2.90E-11 | 2         | 1355.806 | 1355.806 | -3E-04  | 678.9103 | 0                  |
| FASS | High               | FENMTQVMGSSSR                  | M4(Oxidation)                                       | 1        | 104           | 6.60E-10 | 2         | 1458.623 | 1458.623 | -4E-04  | 730.3187 | 0                  |
| FASS | High               | VIENNEGLPPALLGSCNDR            | C16(Carbamidomethyl)                                | 1        | 94.86         | 2.00E-08 | 2         | 2067.005 | 2067.006 | -8E-04  | 1034.51  | 0                  |
| FASS | High               | ASVFEAIEEEDR                   |                                                     | 1        | 86.91         | 9.00E-08 | 2         | 1393.636 | 1393.636 | 0       | 697.8253 | 0                  |
| FASS | High               | NEDSRPLLDVLEGLFK               |                                                     | 1        | 84.31         | 1.20E-07 | 2         | 1957.052 | 1957.052 | 3E-04   | 979.5335 | 1                  |
| FASS | High               | SSASDSLPHDR                    |                                                     | 1        | 79.87         | 4.50E-07 | 2         | 1193.559 | 1193.559 | -5E-04  | 592.7861 | 0                  |
| FASS | High               | ASTALENLQDR                    |                                                     | 1        | 74.85         | 2.00E-06 | 2         | 1329.688 | 1329.689 | -8E-04  | 665.8513 | 0                  |
| FASS | High               | YDTEDEPVEVMR                   | M6(Oxidation); E8(Methyl); M11(Oxidation)           | 1        | 69.58         | 3.20E-07 | 2         | 1559.611 | 1559.612 | -6E-04  | 780.813  | 0                  |
| FASS | High               | DFSINNGYELNR                   |                                                     | 1        | 67.6          | 7.00E-06 | 2         | 1440.66  | 1440.663 | -0.004  | 721.3371 | 0                  |
| FASS | High               | VYQPECNSAK                     | C6(Carbamidomethyl)                                 | 1        | 53.83         | 1.30E-04 | 2         | 1194.533 | 1194.534 | -8E-04  | 598.2738 | 0                  |
| FASS | High               | QLHASPSGR                      |                                                     | 1        | 44.3          | 1.80E-03 | 2         | 951.4883 | 951.4886 | -3E-04  | 476.7514 | 0                  |
| FASS | Accession          | Description                    | Score                                               | Coverage | %f            | Unique   | Peptide # | Peptides | #        | AAs     |          |                    |
| FASS | AT3G25800          | PP2AA2                         | 1076                                                | 43.6     | 11            | 17       | 587       |          |          |         |          |                    |
| FASS | Peptide confidence | Sequence                       | Modifications                                       | Rank     | Peptide score | Expect   | Charge    | Mr(Exp)  | Mr(Calc) | ΔM [Da] | m/z [Da] | # Missed Cleavages |
| FASS | High               | YMVANQLYELCEAVGPEPTR           | M2(Oxidation); C11(Carbamidomethyl)                 | 1        | 138.34        | 6.20E-13 | 2         | 2355.087 | 2355.088 | -4E-04  | 1178.551 | 0                  |
| FASS | High               | TDVMSMFEDLTQDDQDSVR            | M4(Oxidation); M6(Oxidation)                        | 1        | 132.03        | 2.90E-13 | 2         | 2262.925 | 2262.926 | -8E-04  | 1132.47  | 0                  |
| FASS | High               | FFANQALQSIDNVMMS               | M14(Oxidation); M15(Oxidation)                      | 1        | 109.61        | 2.40E-10 | 2         | 1933.855 | 1933.855 | -3E-04  | 967.9346 | 0                  |
| FASS | High               | ESLDVDFHLSLTK                  |                                                     | 1        | 94.85         | 1.90E-08 | 2         | 1500.781 | 1500.782 | -0.002  | 751.3975 | 0                  |
| FASS | High               | ILNPEIAQHILPCVK                | C14(Carbamidomethyl)                                | 1        | 89.37         | 1.40E-08 | 2         | 1857.054 | 1857.055 | -9E-04  | 929.5341 | 0                  |
| FASS | High               | AVSLLAPVMGSEITCSK              | C15(Carbamidomethyl)                                | 1        | 87.06         | 1.40E-07 | 2         | 1761.901 | 1761.901 | 3E-04   | 881.9576 | 0                  |
| FASS | High               | LQQVNVQIGIDLLSQSLPAIVELAEADR   |                                                     | 1        | 85.5          | 3.40E-08 | 3         | 3060.67  | 3060.671 | -4E-04  | 1021.231 | 0                  |
| FASS | High               | SLYTQLQDDMPMVR                 | C7(Carbamidomethyl); M11(Oxidation); M13(Oxidation) | 1        | 77.52         | 3.40E-07 | 2         | 1887.815 | 1887.817 | -0.001  | 944.9149 | 0                  |
| FASS | High               | SALASVIMGMAPVLGK               | M8(Oxidation)                                       | 1        | 76.94         | 9.30E-07 | 2         | 1559.842 | 1559.842 | 3E-04   | 780.9282 | 0                  |
| FASS | High               | PGLVELSEDPDQVDR                |                                                     | 1        | 76.52         | 1.40E-06 | 2         | 1638.81  | 1638.81  | 3E-04   | 820.4125 | 0                  |
| FASS | High               | VLQSLPIVDQSVVEK                |                                                     | 1        | 70.37         | 8.10E-07 | 2         | 1766.018 | 1766.019 | -7E-04  | 884.0164 | 0                  |
| FASS | High               | LAAGEWFTAR                     |                                                     | 1        | 70.01         | 6.30E-06 | 2         | 1120.567 | 1120.567 | 1E-04   | 561.2906 | 0                  |
| FASS | High               | ELSSDSSQVVR                    |                                                     | 1        | 61.6          | 2.20E-05 | 2         | 1243.578 | 1243.579 | -0.001  | 622.7964 | 0                  |
| FASS | High               | LLEPQDCVQHILPVIVNFSQDK         | C7(Carbamidomethyl)                                 | 1        | 55.14         | 1.30E-04 | 3         | 2591.34  | 2591.342 | -0.002  | 864.7873 | 0                  |
| FASS | High               | FAATVESAHLK                    |                                                     | 1        | 54.88         | 1.90E-04 | 2         | 1172.618 | 1172.619 | -0.001  | 587.3162 | 0                  |
| FASS | High               | NDDIQLR                        |                                                     | 1        | 52.64         | 1.80E-04 | 2         | 872.4355 | 872.4352 | 3E-04   | 437.225  | 0                  |
| FASS | High               | TIRPGLVELSEDPDQVDR             |                                                     | 1        | 51.26         | 3.30E-04 | 2         | 2009.042 | 2009.043 | -7E-04  | 1005.528 | 1                  |
| FASS | Accession          | Description                    | Score                                               | Coverage | %f            | Unique   | Peptide # | Peptides | #        | AAs     |          |                    |
| FASS | AT3G53540          | TRM19                          | 876                                                 | 25.8     | 17            | 17       | 924       |          |          |         |          |                    |
| FASS | Peptide confidence | Sequence                       | Modifications                                       | Rank     | Peptide score | Expect   | Charge    | Mr(Exp)  | Mr(Calc) | ΔM [Da] | m/z [Da] | # Missed Cleavages |
| FASS | High               | SHSSYNSPEVSIPTLSLK             |                                                     | 1        | 154.42        | 2.00E-14 | 2         | 2005.958 | 2005.959 | -0.002  | 1003.986 | 0                  |
| FASS | High               | TAMSSSEALDSTVTSVDPDISR         | M3(Oxidation)                                       | 1        | 148.1         | 8.20E-14 | 2         | 2411.136 | 2411.137 | -0.001  | 1206.575 | 0                  |
| FASS | High               | SFSGDANSDEEDSSASDDIK           |                                                     | 1        | 133.68        | 1.20E-13 | 2         | 2133.847 | 2133.846 | 0.001   | 1067.931 | 0                  |
| FASS | High               | HASYDITDLPNEELR                |                                                     | 1        | 112.37        | 2.70E-10 | 2         | 1771.837 | 1771.838 | -6E-04  | 886.9258 | 0                  |
| FASS | High               | PASFNGLSFEDGISK                |                                                     | 1        | 106.28        | 1.30E-09 | 2         | 1567.748 | 1567.752 | -0.004  | 784.8813 | 0                  |
| FASS | High               | ELQWLSEDDIEIGR                 |                                                     | 1        | 104.2         | 1.90E-09 | 2         | 1927.989 | 1927.989 | -4E-04  | 965.0016 | 0                  |
| FASS | High               | EFNDALEALDSNK                  |                                                     | 1        | 97.02         | 8.10E-09 | 2         | 1464.673 | 1464.673 | -3E-04  | 733.3437 | 0                  |
| FASS | High               | TFASPSSSDSEFR                  |                                                     | 1        | 74.08         | 6.40E-07 | 2         | 1416.615 | 1416.616 | -8E-04  | 709.3147 | 0                  |
| FASS | High               | SGTLAEMLATSDR                  |                                                     | 1        | 64.42         | 2.10E-05 | 2         | 1350.645 | 1350.645 | -1E-04  | 676.3297 | 0                  |
| FASS | High               | LLFDQISR                       |                                                     | 1        | 63.55         | 1.80E-05 | 2         | 990.5501 | 990.5498 | 3E-04   | 496.2823 | 0                  |
| FASS | High               | AMSFETSQFR                     |                                                     | 1        | 51.24         | 1.20E-04 | 2         | 1131.501 | 1131.502 | -0.001  | 566.7576 | 0                  |
| FASS | High               | MQLQLK                         |                                                     | 1        | 50.94         | 4.50E-04 | 2         | 872.5149 | 872.5153 | -4E-04  | 437.2647 | 0                  |
| FASS | High               | LPCTTTHGR                      |                                                     | 1        | 46.37         | 6.40E-04 | 2         | 1041.502 | 1041.503 | -3E-04  | 521.7584 | 0                  |
| FASS | High               | FEHEIEISR                      |                                                     | 1        | 41.34         | 3.30E-03 | 2         | 1158.567 | 1158.567 | 0       | 580.2907 | 0                  |
| FASS | High               | FENNIQWPELPEPVGISSR            |                                                     | 1        | 40.7          | 4.90E-03 | 2         | 2211.092 | 2211.096 | -0.004  | 1106.553 | 0                  |
| FASS | High               | TIMNQESAGGYTIVLPK              | M3(Oxidation); E6(Methyl)                           | 1        | 40.33         | 5.40E-03 | 2         | 1850.943 | 1850.945 | -0.002  | 926.4789 | 0                  |
| FASS | High               | FKDVFVLDLAK                    |                                                     | 1        | 37.39         | 7.90E-03 | 2         | 1309.685 | 1309.692 | -0.007  | 655.8497 | 1                  |
| FASS | Accession          | Description                    | Score                                               | Coverage | %f            | Unique   | Peptide # | Peptides | #        | AAs     |          |                    |
| FASS | AT1G13320          | PP2AA3                         | 665                                                 | 32.2     | 7             | 12       | 587       |          |          |         |          |                    |
| FASS | Peptide confidence | Sequence                       | Modifications                                       | Rank     | Peptide score | Expect   | Charge    | Mr(Exp)  | Mr(Calc) | ΔM [Da] | m/z [Da] | # Missed Cleavages |

|      |                    |                               |                                                                     |          |               |                |        |          |          |         |          |                    |
|------|--------------------|-------------------------------|---------------------------------------------------------------------|----------|---------------|----------------|--------|----------|----------|---------|----------|--------------------|
| FASS | High               | YMVANQLYELCEAVGPEPTR          | M2(Oxidation); C11(Carbamidomethyl)                                 | 1        | 138,34        | 6,20E-13       | 2      | 2355,087 | 2355,088 | -4E-04  | 1178,551 | 0                  |
| FASS | High               | ILNPELAHQHILPCVK              | C14(Carbamidomethyl)                                                | 1        | 89,37         | 1,40E-08       | 2      | 1857,054 | 1857,055 | -9E-04  | 929,5341 | 0                  |
| FASS | High               | AVSLLAPVMGSEITCSK             | C15(Carbamidomethyl)                                                | 1        | 87,06         | 1,40E-07       | 2      | 1761,901 | 1761,901 | 3E-04   | 881,9576 | 0                  |
| FASS | High               | LDQVNVIGIDLLSQSLPAIVELAEDR    |                                                                     | 1        | 85,5          | 3,40E-08       | 3      | 3060,67  | 3060,671 | -4E-04  | 1021,231 | 0                  |
| FASS | High               | SALASVIMGMAPVLGK              | M8(Oxidation)                                                       | 1        | 76,94         | 9,30E-07       | 2      | 1559,842 | 1559,842 | 3E-04   | 780,9282 | 0                  |
| FASS | High               | LLEPQDCVAHILPVVNFSDQK         | C7(Carbamidomethyl)                                                 | 1        | 67,41         | 7,60E-06       | 3      | 2534,319 | 2534,32  | -0,001  | 845,7803 | 0                  |
| FASS | High               | LSAGEWFTAR                    |                                                                     | 1        | 63,26         | 2,80E-05       | 2      | 1136,561 | 1136,561 | -3E-04  | 569,2879 | 0                  |
| FASS | High               | ELSSDSSSHYVR                  |                                                                     | 1        | 61,5          | 2,20E-05       | 2      | 1243,578 | 1243,579 | -0,001  | 622,7964 | 0                  |
| FASS | High               | ESDLYVEHFTPLAK                |                                                                     | 1        | 58,29         | 1,10E-04       | 2      | 1484,751 | 1484,751 | 4E-04   | 743,3827 | 0                  |
| FASS | High               | FAATIESAHLK                   |                                                                     | 1        | 53,26         | 2,90E-04       | 2      | 1186,634 | 1186,635 | -3E-04  | 594,3244 | 0                  |
| FASS | High               | SIYGQLQDDMPMVR                | C7(Carbamidomethyl); M11(Oxidation); M13(Oxidation)                 | 1        | 48,29         | 2,30E-04       | 2      | 1843,788 | 1843,79  | -0,002  | 922,9013 | 0                  |
| FASS | High               | LLPAVITASK                    |                                                                     | 1        | 29,37         | 5,30E-03       | 2      | 1011,633 | 1011,633 | -3E-04  | 506,8235 | 0                  |
| FASS |                    |                               |                                                                     |          |               |                |        |          |          |         |          |                    |
| FASS | Accession          | Description                   | Score                                                               | Coverage | %f            | Unique Peptide | #      | Peptides | #        | AAs     |          |                    |
| FASS | AT3G58500          | PP2A4                         | 477                                                                 | 40,9     | 2             | 10             | 313    |          |          |         |          |                    |
| FASS | Peptide confidence | Sequence                      | Modifications                                                       | Rank     | Peptide score | Expect         | Charge | Mr(Exp)  | Mr(Calc) | ΔM [Da] | m/z [Da] | # Missed Cleavages |
| FASS | High               | GAGYTFQDDISEQFNHTNNLK         |                                                                     | 1        | 118,69        | 5,40E-11       | 2      | 2340,075 | 2340,077 | -0,002  | 1171,045 | 0                  |
| FASS | High               | EILMDESNVQPK                  | M4(Oxidation)                                                       | 1        | 98,09         | 9,30E-09       | 2      | 1516,743 | 1516,744 | -0,002  | 759,3786 | 0                  |
| FASS | High               | CPDNTYLFMGDYVDR               | C1(Carbamidomethyl); M9(Oxidation)                                  | 1        | 97,65         | 1,40E-09       | 2      | 1880,77  | 1880,771 | -0,001  | 941,392  | 0                  |
| FASS | High               | QITQVYGFYDECLR                | C12(Carbamidomethyl)                                                | 1        | 89,96         | 4,60E-08       | 2      | 1790,83  | 1790,83  | 0       | 896,4222 | 0                  |
| FASS | High               | VVTFISAPNYCYR                 | C11(Carbamidomethyl)                                                | 1        | 66,82         | 1,20E-05       | 2      | 1588,77  | 1588,771 | -0,001  | 795,3921 | 0                  |
| FASS | High               | YGNANWIK                      |                                                                     | 1        | 66,68         | 1,10E-05       | 2      | 950,4605 | 950,461  | -5E-04  | 476,2375 | 0                  |
| FASS | High               | NHTFIQIEFPAPR                 |                                                                     | 1        | 64,58         | 1,80E-05       | 2      | 1455,726 | 1455,726 | -4E-04  | 728,37   | 0                  |
| FASS | High               | PLSEQQVR                      |                                                                     | 1        | 52,18         | 1,80E-04       | 2      | 955,5086 | 955,5087 | -1E-04  | 478,7616 | 0                  |
| FASS | High               | RGEPDVTR                      |                                                                     | 1        | 50,65         | 2,60E-04       | 2      | 928,4722 | 928,4726 | -5E-04  | 465,2434 | 1                  |
| FASS | High               | AHQLVMDGFNWAHEQK              | M6(Oxidation)                                                       | 1        | 42,95         | 2,00E-03       | 3      | 1925,883 | 1925,884 | -9E-04  | 642,9684 | 0                  |
| FASS |                    |                               |                                                                     |          |               |                |        |          |          |         |          |                    |
| FASS | Accession          | Description                   | Score                                                               | Coverage | %f            | Unique Peptide | #      | Peptides | #        | AAs     |          |                    |
| FASS | AT5G26910          | TRM8                          | 366                                                                 | 22,3     | 13            | 13             | 853    |          |          |         |          |                    |
| FASS | Peptide confidence | Sequence                      | Modifications                                                       | Rank     | Peptide score | Expect         | Charge | Mr(Exp)  | Mr(Calc) | ΔM [Da] | m/z [Da] | # Missed Cleavages |
| FASS | High               | ETVEEGIDIEGIEVSTLVDLNDLVSGTOR |                                                                     | 1        | 105,63        | 1,20E-09       | 3      | 3408,656 | 3407,647 | 1,009   | 1137,226 | 0                  |
| FASS | High               | SDSSCCASSVTSDDGGQTR           | C5(Carbamidomethyl); C6(Carbamidomethyl)                            | 1        | 83,18         | 7,70E-09       | 2      | 1975,749 | 1975,748 | 9E-04   | 988,8819 | 0                  |
| FASS | High               | EYALGMATDVLPAFLFDEMEGR        | M6(Oxidation); M19(Oxidation)                                       | 1        | 77,96         | 5,30E-07       | 2      | 2446,108 | 2446,103 | 0,004   | 1224,061 | 0                  |
| FASS | High               | DNQPSMTSVLNQK                 | M6(Oxidation)                                                       | 1        | 76,26         | 1,20E-06       | 2      | 1476,888 | 1476,888 | 4E-04   | 739,3514 | 0                  |
| FASS | High               | EGVVSALVEPHLSAF               |                                                                     | 1        | 63,41         | 1,60E-05       | 2      | 1666,894 | 1666,893 | 8E-04   | 834,4542 | 0                  |
| FASS | High               | QLGLSTASAEK                   |                                                                     | 1        | 58,88         | 2,50E-04       | 2      | 1103,582 | 1103,582 | -8E-04  | 552,798  | 0                  |
| FASS | High               | DWLAEELNLR                    |                                                                     | 1        | 47,62         | 7,20E-04       | 2      | 1144,551 | 1144,551 | 1E-04   | 573,283  | 0                  |
| FASS | High               | VSLVEIDEIK                    |                                                                     | 1        | 46,62         | 1,30E-03       | 2      | 1200,66  | 1200,66  | -6E-04  | 601,3371 | 0                  |
| FASS | High               | GGFLFEQR                      |                                                                     | 1        | 41,95         | 2,90E-03       | 2      | 952,4771 | 952,4767 | 5E-04   | 477,2458 | 0                  |
| FASS | High               | CEQFMFGSCR                    | Carbamidomethyl); M4(Oxidation); M6(Oxidation); C9(Carbamidomethyl) | 1        | 41,54         | 7,00E-05       | 2      | 1336,466 | 1336,467 | -4E-04  | 669,2405 | 0                  |
| FASS | High               | ITSLTTPSTSK                   |                                                                     | 1        | 40,77         | 3,90E-03       | 2      | 1235,663 | 1235,661 | 0,002   | 618,8387 | 0                  |
| FASS | High               | VPVESGSISK                    |                                                                     | 1        | 40,69         | 5,40E-03       | 2      | 1001,539 | 1001,539 | -6E-04  | 501,7766 | 0                  |
| FASS | High               | QNSNDFNLK                     |                                                                     | 1        | 38,21         | 7,60E-03       | 2      | 1179,551 | 1179,552 | -7E-04  | 590,7829 | 0                  |
| FASS |                    |                               |                                                                     |          |               |                |        |          |          |         |          |                    |
| FASS | Accession          | Description                   | Score                                                               | Coverage | %f            | Unique Peptide | #      | Peptides | #        | AAs     |          |                    |
| FASS | AT2G45240          | MAP1A                         | 270                                                                 | 26,4     | 8             | 8              | 398    |          |          |         |          |                    |
| FASS | Peptide confidence | Sequence                      | Modifications                                                       | Rank     | Peptide score | Expect         | Charge | Mr(Exp)  | Mr(Calc) | ΔM [Da] | m/z [Da] | # Missed Cleavages |
| FASS | High               | VEPNSDLQHVVEIK                |                                                                     | 1        | 83,72         | 2,70E-07       | 2      | 1605,834 | 1605,836 | -0,002  | 803,9243 | 0                  |
| FASS | High               | LPSSPDVYFPWLTK                |                                                                     | 1        | 79,16         | 7,90E-07       | 2      | 1501,781 | 1501,782 | -4E-04  | 751,8979 | 0                  |
| FASS | High               | WVPAIEKPKWIDGTPK              |                                                                     | 1        | 76,65         | 9,50E-07       | 2      | 1964,024 | 1964,026 | -0,001  | 983,0194 | 1                  |
| FASS | High               | SAQFEHTLVTGVEVLTAR            |                                                                     | 1        | 74,98         | 1,20E-06       | 3      | 2300,204 | 2300,201 | 0,003   | 767,7419 | 0                  |
| FASS | High               | VIHPGVTTDEIDR                 |                                                                     | 1        | 54,41         | 2,40E-04       | 2      | 1450,741 | 1450,742 | -9E-04  | 726,3776 | 0                  |
| FASS | High               | EVLDAAR                       |                                                                     | 1        | 52,36         | 2,00E-04       | 2      | 843,4437 | 843,445  | -0,001  | 422,7292 | 0                  |
| FASS | High               | EIGEIVNR                      |                                                                     | 1        | 44,47         | 1,20E-03       | 2      | 928,4976 | 928,4978 | -1E-04  | 465,2561 | 0                  |
| FASS | High               | AIIVKPGVR                     |                                                                     | 1        | 36,16         | 3,40E-04       | 2      | 1022,66  | 1022,66  | -3E-04  | 512,3372 | 1                  |
| FASS |                    |                               |                                                                     |          |               |                |        |          |          |         |          |                    |
| FASS | Accession          | Description                   | Score                                                               | Coverage | %f            | Unique Peptide | #      | Peptides | #        | AAs     |          |                    |
| FASS | AT3G05750          | TRM6                          | 190                                                                 | 7,9      | 6             | 6              | 801    |          |          |         |          |                    |
| FASS | Peptide confidence | Sequence                      | Modifications                                                       | Rank     | Peptide score | Expect         | Charge | Mr(Exp)  | Mr(Calc) | ΔM [Da] | m/z [Da] | # Missed Cleavages |
| FASS | High               | QNQFAETSVSNQR                 |                                                                     | 1        | 64,48         | 1,80E-05       | 2      | 1507,702 | 1507,702 | 3E-04   | 754,8582 | 0                  |
| FASS | High               | FSSSDSSSLPMK                  | M12(Oxidation)                                                      | 1        | 58,48         | 2,40E-05       | 2      | 1374,596 | 1374,597 | -9E-04  | 688,3055 | 0                  |
| FASS | High               | QDIFLER                       |                                                                     | 1        | 53,34         | 3,70E-04       | 2      | 919,4763 | 919,4763 | 0       | 460,7455 | 0                  |
| FASS | High               | SPGFVQSR                      |                                                                     | 1        | 46,03         | 2,00E-03       | 2      | 876,4449 | 876,4454 | -4E-04  | 439,2298 | 0                  |
| FASS | High               | CEQMFMGTCK                    | Carbamidomethyl); M4(Oxidation); M6(Oxidation); C9(Carbamidomethyl) | 1        | 40,14         | 9,70E-05       | 2      | 1322,476 | 1322,476 | -3E-04  | 662,2453 | 0                  |
| FASS |                    |                               |                                                                     |          |               |                |        |          |          |         |          |                    |
| FASS | Accession          | Description                   | Score                                                               | Coverage | %f            | Unique Peptide | #      | Peptides | #        | AAs     |          |                    |
| FASS | AT4G28760          | TRM20                         | 186                                                                 | 6        | 4             | 4              | 924    |          |          |         |          |                    |
| FASS | Peptide confidence | Sequence                      | Modifications                                                       | Rank     | Peptide score | Expect         | Charge | Mr(Exp)  | Mr(Calc) | ΔM [Da] | m/z [Da] | # Missed Cleavages |
| FASS | High               | LLQELVEEAVIDLTR               |                                                                     | 1        | 112,2         | 1,20E-10       | 2      | 1739,968 | 1739,967 | 0,001   | 870,9912 | 0                  |
| FASS | High               | INSIVSETTTTR                  |                                                                     | 1        | 90,69         | 5,40E-08       | 2      | 1320,687 | 1320,689 | -0,001  | 661,351  | 0                  |
| FASS | High               | VSNLFFFK                      |                                                                     | 1        | 52,73         | 2,70E-04       | 2      | 1000,538 | 1000,538 | -1E-04  | 501,2763 | 0                  |
| FASS | High               | GTEEHTVQPTR                   |                                                                     | 1        | 38,82         | 6,30E-03       | 2      | 1253,599 | 1253,6   | -0,001  | 627,8068 | 0                  |
| FASS |                    |                               |                                                                     |          |               |                |        |          |          |         |          |                    |
| FASS | Accession          | Description                   | Score                                                               | Coverage | %f            | Unique Peptide | #      | Peptides | #        | AAs     |          |                    |
| FASS | AT1G63670          | TRM12                         | 131                                                                 | 7,3      | 4             | 4              | 689    |          |          |         |          |                    |
| FASS | Peptide confidence | Sequence                      | Modifications                                                       | Rank     | Peptide score | Expect         | Charge | Mr(Exp)  | Mr(Calc) | ΔM [Da] | m/z [Da] | # Missed Cleavages |
| FASS | High               | IGLSFDPNIDLEIK                |                                                                     | 1        | 72,17         | 3,80E-06       | 2      | 1697,865 | 1687,867 | -0,002  | 844,9397 | 0                  |
| FASS | High               | TSDVSTVYVYVHR                 |                                                                     | 1        | 65,85         | 6,50E-06       | 2      | 1245,595 | 1245,595 | -1E-04  | 623,8047 | 0                  |
| FASS | High               | VLNLESSLR                     |                                                                     | 1        | 63,7          | 2,30E-04       | 2      | 1029,584 | 1029,582 | 0,002   | 515,7993 | 0                  |
| FASS | High               | QEQQPSPVSVLER                 |                                                                     | 1        | 43,53         | 2,70E-03       | 2      | 1624,803 | 1624,806 | -0,003  | 813,4088 | 0                  |
| FASS |                    |                               |                                                                     |          |               |                |        |          |          |         |          |                    |
| FASS | Accession          | Description                   | Score                                                               | Coverage | %f            | Unique Peptide | #      | Peptides | #        | AAs     |          |                    |
| FASS | AT1G74160          | TRM4                          | 85                                                                  | 2,3      | 2             | 2              | 1025   |          |          |         |          |                    |
| FASS | Peptide confidence | Sequence                      | Modifications                                                       | Rank     | Peptide score | Expect         | Charge | Mr(Exp)  | Mr(Calc) | ΔM [Da] | m/z [Da] | # Missed Cleavages |
| FASS | High               | SENFLEEEDDFLK                 |                                                                     | 1        | 81,76         | 2,80E-07       | 2      | 1726,795 | 1726,794 | 0,002   | 864,4049 | 0                  |
| FASS | High               | SILAEVDVTR                    |                                                                     | 1        | 39,09         | 6,50E-03       | 2      | 1115,62  | 1115,619 | 0,002   | 558,8174 | 0                  |

Protein identification details were obtained with the LTQ Orbitrap Velos (Thermo Fisher Scientific) and Mascot Distiller software (version 2.3.2.0, Matrix Science) combined with the Mascot search engine (Matrix Science) using the Mascot Daemon interface (version 2.4, Matrix Science).

Proteins and peptides headers used in the table are listed below.

**Score:** Displays the protein score. **Coverage %:** Displays by default the percentage of the protein sequence covered by identified peptides. **# Unique Peptides:** Displays the number of peptide sequences unique to a protein group. **# Peptides:** Displays the number of distinct peptide sequences in the protein group. **# AAs:** Shows by default the sequence length of the protein. **Peptide Confidence:** Indicates a confidence level associated with the peptide sequence: high confidence (>99%), medium confidence (>95%, <99%), low confidence (<95%). **Sequence:** Displays the sequence of amino acids that compose the peptide. **Modifications:** Displays the static and dynamic modifications identified in the peptide. **Rank:** Displays the ordering of peptides by rank. **Peptide score:** Displays the peptide ions score. **Expect:** Expectation value for the peptide match. (The number of times we would expect to obtain an equal or higher score, purely by chance. The lower this value, the more significant the result.) **Charge:** Displays the charge state of the peptide. **Mr(Exp):** experimental relative molecular mass, in daltons. **Mr(Calc):** calculated relative molecular mass, in daltons.  **$\Delta M$  [Da]:** difference (error) between the experimental and calculated masses, in daltons. **m/z [Da]:** Displays the mass-to-charge ratio of the precursor ion, in daltons. **# Missed Cleavages:** Displays the number of cleavage sites in a peptide sequence that a cleavage reagent (enzyme) did not cleave. This number excludes cases where an amino acid such as proline inhibits the cleaving enzyme. For example, if proline resides next to lysine or arginine, trypsin does not cleave the lysine or arginine. The # of Missed Cleavages value is 0 for a complete digest of all peptides.



**Supplementary Table S4: List of primers used in this study**

| Primer name          | Construct                                                                             | Sequence                                                |
|----------------------|---------------------------------------------------------------------------------------|---------------------------------------------------------|
| TON1a_fwd            | Entry vectors of TON1a, TON1b, FASS and TRM19 to generate TAP constructs              | published Van Leene et. al. 2007                        |
| TON1a_nostop_rev     |                                                                                       | published Van Leene et. al. 2007                        |
| TON1a_stop_rev       |                                                                                       | AGAAAGCTGGGTCTCAATCTTCCCTTCTTCTTC                       |
| TON1b_fwd            |                                                                                       | AAAAAGCAGGCTCCACCATTGACATTATACAAGAGAG                   |
| TON1b_stop_rev       |                                                                                       | AGAAAGCTGGGTCTCAATCTTCCCTTCTTCTTCTTC                    |
| TON1b_nostop_rev     |                                                                                       | AGAAAGCTGGGTCTTCTTCCCTTCTTCTTCTTCAC                     |
| FASS_fwd             |                                                                                       | AAAAAGCAGGCTCCACCATTGATAGCGGATCTAGCGATGG                |
| FASS_stop_rev        |                                                                                       | AGAAAGCTGGGTCTCACTGAGACTTCTCTCAGG                       |
| FASS_nostop_rev      |                                                                                       | AGAAAGCTGGGTCTGAGACTTCTCTCAGGTGG                        |
| AT3G53540_fwd        |                                                                                       | AAAAAGCAGGCTCCACCATTGACAGATTTGCACTCAGC                  |
| AT3G53540_stop_rev   |                                                                                       | AGAAAGCTGGGTCTAGAAAGATTGCACCTACCACAAGC                  |
| AT3G53540_nostop_rev |                                                                                       | AGAAAGCTGGGTGCGAAGATTGCACCTACCACAAGC                    |
| attB1-F              |                                                                                       | GGGGACAAGTTTGTACAAAAAAGCAGGCTCCACC                      |
| attB2-R              |                                                                                       | GGGGACCACTTTGTACAAGAAAGCTGGGTCT                         |
| FASSGW (+1)          |                                                                                       | Entry vectors of FASS and truncated versions of FASS    |
| FASSGW (-480)        | GGGGACCACTTTGTACAAGAAAGCTGGGTACTGAGACTTCTCTCAG                                        |                                                         |
| FASSGW (-185)        | GGGGACCACTTTGTACAAGAAAGCTGGGTCCGTGCGCATCACATAAG                                       |                                                         |
| FASSGW (+186)        | GGGGACAAGTTTGTACAAAAAAGCAGGCTACAAAATGGTGTCCCTTACACAAGC                                |                                                         |
| TRM1 (+1)            | Entry vectors of TRM1 and truncated versions of TRM1                                  | GGGGACAAGTTTGTACAAAAAAGCAGGCTACAAAATGTCTGCAAAACTTCT     |
| TRM1 (+587)          |                                                                                       | GGGGACAAGTTTGTACAAAAAAGCAGGCTACAAAATGAGCTTGGGATCGAATGTT |
| TRM1 (-698)          |                                                                                       | GGGGACCACTTTGTACAAGAAAGCTGGGTATTATCCCGGTTACTCTGAGG      |
| TRM1 (-827)          |                                                                                       | GGGGACCACTTTGTACAAGAAAGCTGGGTATTTTAAAGTGGATTTGC         |
| TRM1 (-905)          |                                                                                       | GGGGACCACTTTGTACAAGAAAGCTGGGTAGCAGAAAGCAAACTTCAT        |
| TON1a (+1)           | Entry vectors of TON1a and truncated versions of TON1a                                | GGGGACAAGTTTGTACAAAAAAGCAGGCTTGTAGGACATTATACAAG         |
| TON1a (-107)         |                                                                                       | GGGGACCACTTTGTACAAGAAAGCTGGGTACGAAATCTTTTGGCAA          |
| TON1a (+108)         |                                                                                       | GGGGACAAGTTTGTACAAAAAAGCAGGCTACAAAATGTGGAAGTCTGAGTTACG  |
| TON1a (-260)         |                                                                                       | GGGGACCACTTTGTACAAGAAAGCTGGGTAACTTCTTCCCTTCTTC          |
| RCN1GW FWD           |                                                                                       | PP2AA1 entry vector                                     |
| RCN1GW REV           | PP2AA1 entry vector                                                                   | GGGGACCACTTTGTACAAGAAAGCTGGGTAGGATTTGCTGCTGTGG          |
| TRM8 (+1)            | TRM8 entry vector                                                                     | GGGGACAAGTTTGTACAAAAAAGCAGGCTACAAAATGGAGTTGTTGAGAGG     |
| TRM8 (-854)          | TRM8 entry vector                                                                     | GGGGACCACTTTGTACAAGAAAGCTGGGTAGAATGCCGAGAGAAGAT         |
| R1                   | Genotyping of <i>pp2aa1</i> mutant                                                    | AGCACATCCTTCTTGTGTGAAGG                                 |
| R2                   |                                                                                       | AACTTGCTTATGATGTTAAGGCGC                                |
| T (T-DNA)            | Genotyping of <i>pp2aa2</i> mutant                                                    | TGTCGCCGCTCATCGGGGGGGT                                  |
| oA2RAV               |                                                                                       | GCCTGCGGTGTCTCTTCTTGACC                                 |
| oA2new3'             | Genotyping of <i>pp2aa2</i> mutant                                                    | CACATTAGTAGCAAGACAATGGACAAAAACCCG                       |
| oA3leader            | Genotyping of <i>pp2aa3</i> mutant                                                    | GATCGCTCGGAACCTTGGAAAGCAGC                              |
| oA3DDEV              |                                                                                       | GCCAAAAGCACCTCATCGTCATCGTC                              |
| SALK_069250 RP       | Genotyping of <i>pp2ac3</i> mutant                                                    | TGTTTCTGATCTGTTTCCG                                     |
| SALK_069250 LP       |                                                                                       | TAATTGGTATCAGGGCACTGC                                   |
| SALK_035009 RP       | Genotyping of <i>pp2ac4</i> mutant                                                    | GTGGATTATCACCATCCATCG                                   |
| SALK_035009 LP       |                                                                                       | GCTTGAAGAACAGCATTTCG                                    |
| LB-Salk2             | Genotyping of <i>pp2aa2</i> , <i>pp2aa3</i> , <i>pp2ac3</i> and <i>pp2ac4</i> mutants | GCTTCTTCCCTTCTTCTCTC                                    |
| ACT2_2_FWD           | RT-PCR primers for actin, eif4A, PP2Ac1-c5 and PP2AA1-A3                              | TTGACTACGAGCAGGAGATGG                                   |
| ACT2_2_REV           |                                                                                       | ACAACAGAGGGCTGGAAACAAG                                  |
| eif4A-FWD            |                                                                                       | ACGGAGACATGGACCAAGAAC                                   |
| eif4A-REV            |                                                                                       | GCTGAGTTGGGAGATCGAAG                                    |
| at3g58500_LP1        |                                                                                       | TCTGCGAAAGTATGGCAATG                                    |
| at3g58500_RP1        |                                                                                       | CCACCGTGAAGGCAGAATA                                     |
| at2g42500_LP2        |                                                                                       | GAACCACACCTTCATCCAGTTT                                  |
| at2g42500_RP2        |                                                                                       | TGAGATGAGTCTGTGCCAGTGA                                  |
| at3g25800_fwd        |                                                                                       | CGATGCTGTGCTAACAATC                                     |
| at3g25800_rev        |                                                                                       | ATTGCCATTGAGGACCA                                       |
| at1g10430_fwd        |                                                                                       | CCAGAGAAGCTAGGAGGATTTGATC                               |
| at1g10430_rev        |                                                                                       | TTGAAAAGCCACCACCGATCC                                   |
| at1g59830_fwd        |                                                                                       | TATGAGAGAAAACAAAACCAAGACG                               |
| at1g59830_rev        |                                                                                       | TCTCGTCTGCTCTCTTTAAC                                    |
| at1g69960_fwd        |                                                                                       | ATGGACCAGAAATTCCTTCAGTTTG                               |
| at1g69960_rev        |                                                                                       | TAGTGTGTGGAATTGCAGCTTTAG                                |
| at1g13320_fwd        |                                                                                       | GACCGGAGCCAACCTAGGAC                                    |
| at1g13320_rev        |                                                                                       | AAAACCTTGGTAACTTTTCCAGCA                                |
| at1g25490-fwd        |                                                                                       | ATCCTTGTACCAGGCAAT                                      |
| at1g25490-rev        |                                                                                       | TGCAAGTCGGACTCTCCAG                                     |

### **Supplementary Methods for the LC-MS/MS VELOS1 analysis (related to Supplementary Table S2)**

Tuning of equipment and sample analyses were performed using a standard operation procedure. Quality performance of the LC MS analyses was assessed using control standards. Nanoflow LC-MS/MS analyses were performed on a dual channel NanoLC Ultra 2D system (Eksigent, Dublin, California, USA) and connected to an LTQ Orbitrap Velos mass spectrometer (Thermo, Bremen, Germany) using a chip based nano electrospray source (Triversa Advion Biosystems, Ithaca, NY, USA) operated at 1.8 kV. Mobile phase A (CH<sub>3</sub>CN : CHOOH : H<sub>2</sub>O in a 2:0.1:97.9 (v/v) ratio) and mobile phase B (CH<sub>3</sub>CN : CHOOH : H<sub>2</sub>O in a 90:0.1:9.9 (v/v) ratio) were reconstituted from ULC/MS-grade CH<sub>3</sub>CN, CHOOH and H<sub>2</sub>O (Biosolve-chemicals, Valkenswaard, the Netherlands). All standards and samples were dissolved in mobile phase A. A volume of 10 µL of each sample or control standard was loaded on a C<sub>18</sub> precolumn (PepMap 100, 5 µm particles, 20 mm x 200 µm ID, Dionex, Sunnyvale, California, USA) using a flow rate of 6 µL/min (100% mobile phase A). Five minutes after injection the trapping column was switched in line with an analytical C<sub>18</sub> column (Acclaim Pepmap 100, 3 µm particles, 150 mm x 75 µm ID, Dionex). Effective elution of peptides was accomplished within a 45 minutes gradient flow (95% A to 50% A) at a flow rate of 350 nl/min.

MS spectra were recorded in the orbitrap FT analyzer with a resolution of 60000 (at m/z 400) and an AGC target setting of 500000. The maximum injection time was set to 500 msec and lock mass was enabled (polysiloxane ion at m/z 445.12024). Collision induced dissociation MS/MS spectra were acquired using the ion trap in data dependent mode selecting up to the 20 most abundant multiply charged precursor ions from the MS spectrum. The maximum injection time was set to 50 msec and an AGC setting of 7500. Fragmentation was accomplished by CID wideband activation at normalized collision energy of 35 eV and a 30msec activation time. After MS/MS the precursor m/z's were excluded for 30 seconds. Peak lists were generated and submitted for protein identification with Proteome Discoverer 1.3.0.339 (Thermo, Bremen, Germany). Spectrum grouping was allowed with a maximum retention time of 1 minute and a precursor mass tolerance of 2 ppm. Peak lists were generated only for MS/MS spectra containing more than 5 peaks, with a total intensity above 50. The relative signal-to-noise limit was set to 5. Peak lists were submitted for protein identification against TAIR10 containing 35386 sequence entries with search engine SEQUEST. Enzyme was set to trypsin, allowing for maximum 1 missed cleavage site. Precursor mass tolerance was set to 3 ppm and fragment mass tolerance at 0.8 Da. Fixed modifications were set to carbamidomethylation of cysteines. Variable modifications were set to methionine oxidation and methylation of aspartic acid and glutamic acid, with a maximum of 4 modifications per peptide. Peptides were validated using a decoy database search. The strict target False Discovery Rate (FDR) was set to 0.01 (or 1%), the relaxed FDR was set to 0.05 (or 5%). Only high confident (>99%) peptides were withheld. Only proteins with at least two matched high confident peptides were retained.

### **Supplementary Methods for the LC-MS/MS VELOS2 analysis (related to Supplementary Table S3)**

The obtained peptide mixtures were introduced into an LC-MS/MS system, the Ultimate 3000 RSLC nano (Dionex, Amsterdam, The Netherlands) in-line connected to an LTQ Orbitrap Velos (Thermo Fisher Scientific, Bremen, Germany). The sample mixture was loaded on a trapping column (made in-house, 100 µm internal diameter (I.D.) x 20 mm (length), 5 µm

C18 Reprosil-HD beads, Dr. Maisch GmbH, Ammerbuch-Entringen, Germany). After back-flushing from the trapping column, the sample was loaded on a reverse-phase column (made in-house, 75  $\mu$ m I.D. x 150 mm, 5  $\mu$ m C18 Reprosil-HD beads, Dr. Maisch). Peptides were loaded with solvent A (0.1% trifluoroacetic acid, 2% acetonitrile), and separated with a linear gradient from 2% solvent A' (0.1% formic acid) to 50% solvent B' (0.1% formic acid and 80% acetonitrile) at a flow rate of 300 nl/min, followed by a wash step reaching 100% solvent B'.

The mass spectrometer was operated in data-dependent mode, automatically switching between MS and MS/MS acquisition for the ten most abundant peaks in a given MS spectrum. In the LTQ-Orbitrap Velos, full scan MS spectra were acquired in the Orbitrap at a target value of 1E6 with a resolution of 60,000. The ten most intense ions were then isolated for fragmentation in the linear ion trap, with a dynamic exclusion of 20 seconds. Peptides were fragmented after filling the ion trap at a target value of 1E4 ion counts.

From the MS/MS data in each LC run, Mascot Generic Files were created using the Mascot Distiller software (version 2.3.2.0, Matrix Science, [www.matrixscience.com/Distiller.html](http://www.matrixscience.com/Distiller.html)). When generating these peak lists, grouping of spectra was allowed with a maximum intermediate retention time of 30 seconds and a maximum intermediate scan count of 5 was used where possible. Grouping was done with 0.005 Da precursor tolerance. A peak list was only generated when the MS/MS spectrum contained more than 10 peaks. There was no de-isotoping and the relative signal-to-noise limit was set to 2. These peak lists were then searched with the Mascot search engine (MatrixScience, [www.matrixscience.com](http://www.matrixscience.com), PMID 10612281) using the Mascot Daemon interface (version 2.4, Matrix Science). Spectra were searched against the TAIR10 database containing 35386 sequence entries. Variable modifications were set to methionine oxidation and methylation of aspartic acid and glutamic acid. Fixed modifications were set to carbamidomethylation of cysteines. Mass tolerance on MS was set to 10 ppm (with Mascot's C13 option set to 1) and the MS/MS tolerance at 0.5 Da. The peptide charge was set to 1+, 2+ and 3+ and the instrument setting was set to ESI-TRAP. Trypsin was set as the protease used, allowing for 1 missed cleavage, and also cleavage was allowed when arginine or lysine is followed by proline. Only high confident peptides, ranked one and with scores above the threshold score, set at 99% confidence, were withheld. Only proteins with at least two matched high confident peptides were retained.
